# Supplementary material for: Metal coordination of phosphoniocarbynes
Source: Royal Society of Chemistry journal article supplement (doi:10.1039/d0dt02737e), 2020-01-01

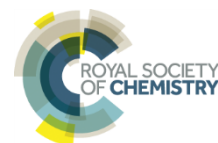

## Dalton Transactions

### SUPPORTING INFORMATION

#### Electronic Supporting Information for:

#### **Metal coordination of phosphoniocarbynes**

**Chee S. Onn, Anthony F. Hill and Angus Olding**

**Cartesian coordinates for model complexes and Selected Spectra**

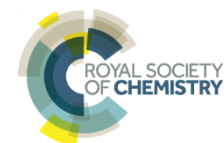

## SUPPORTING INFORMATION

Figure S1.  $^1\text{H}$  NMR Spectrum of  $[1\mathbf{a}]\text{PF}_6$ 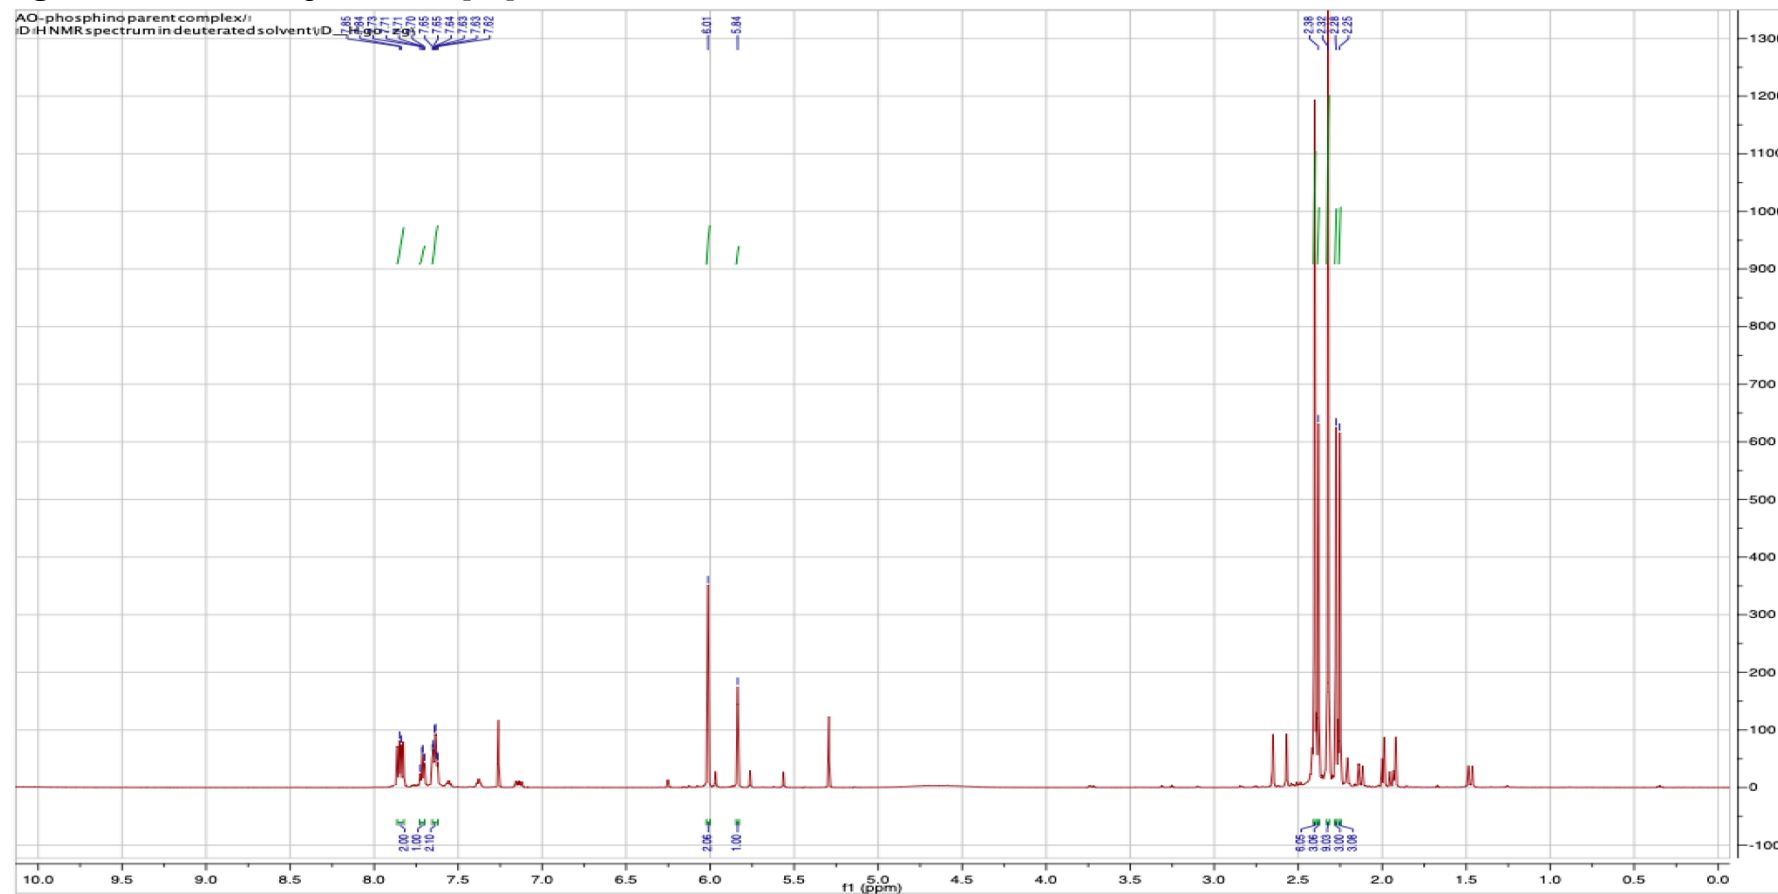

**Figure S2.**  $^{13}\text{C}\{^1\text{H}\}$  NMR Spectrum of  $[\mathbf{1a}]\text{PF}_6$ 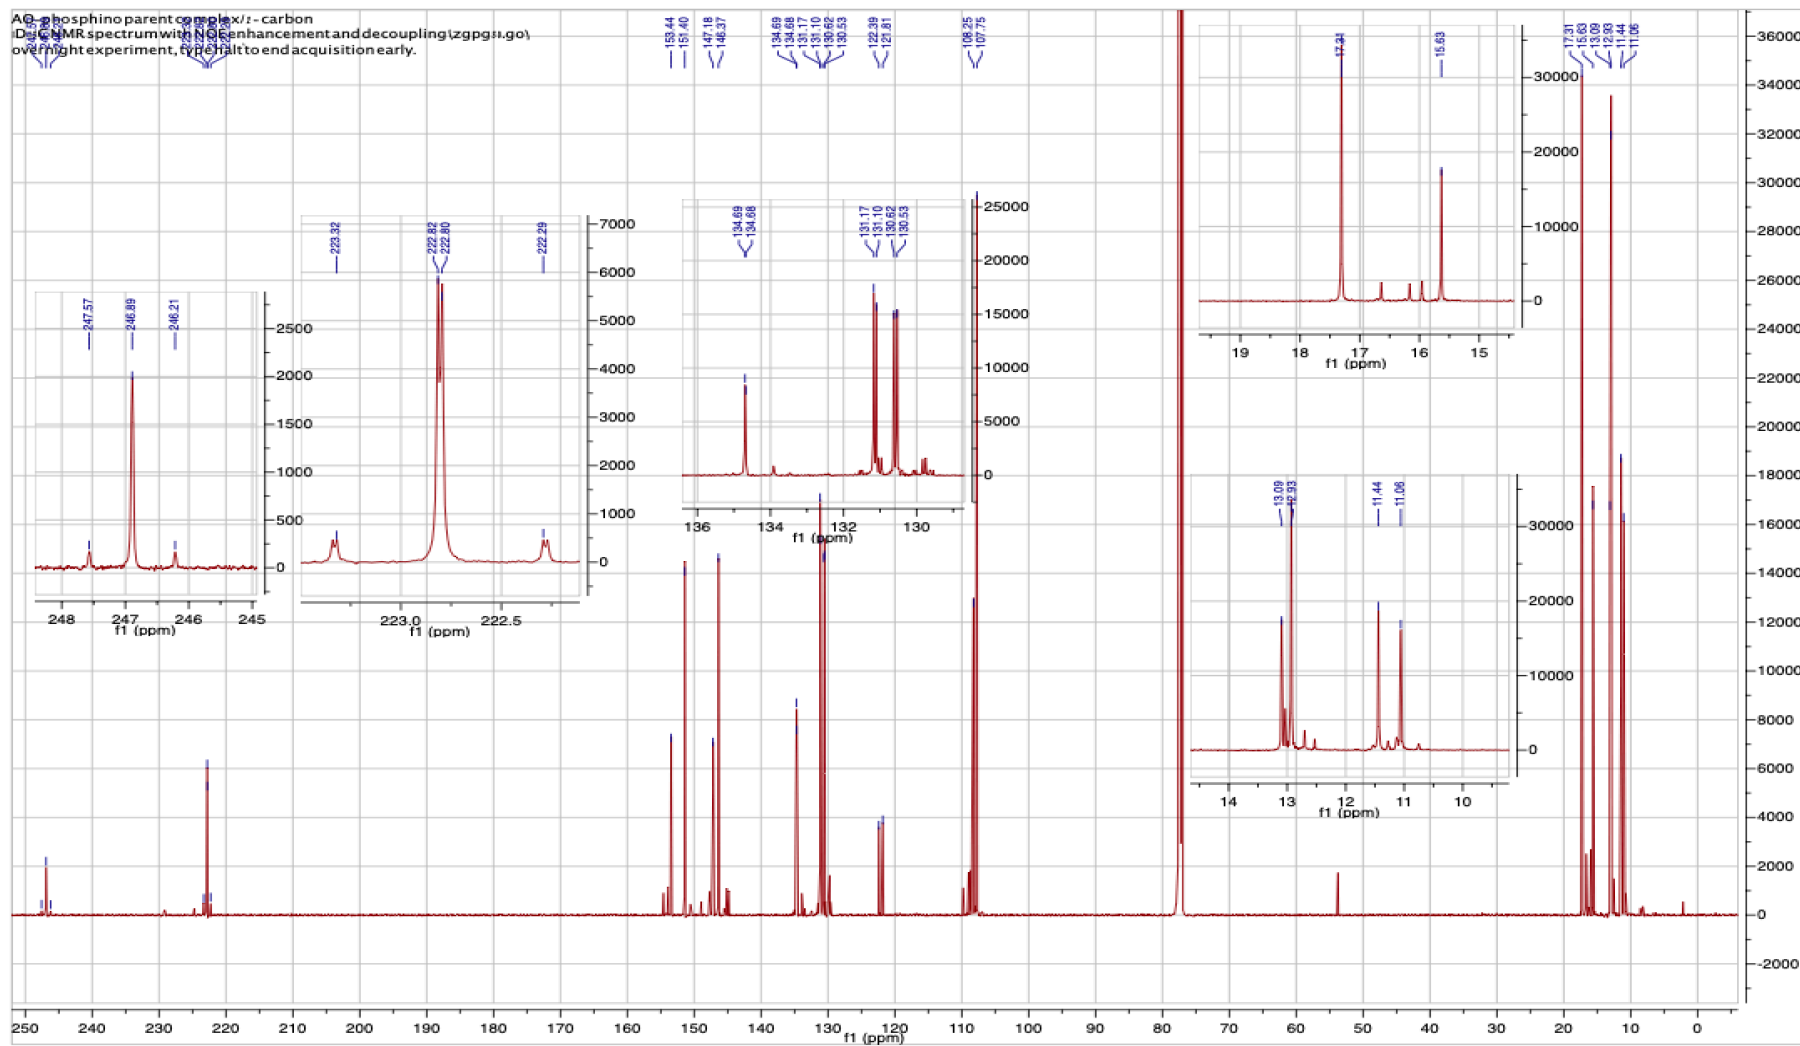

**Figure S3.**  $^{31}\text{P}$ (proton coupled) NMR Spectrum of  $[\mathbf{1a}]\text{PF}_6$ 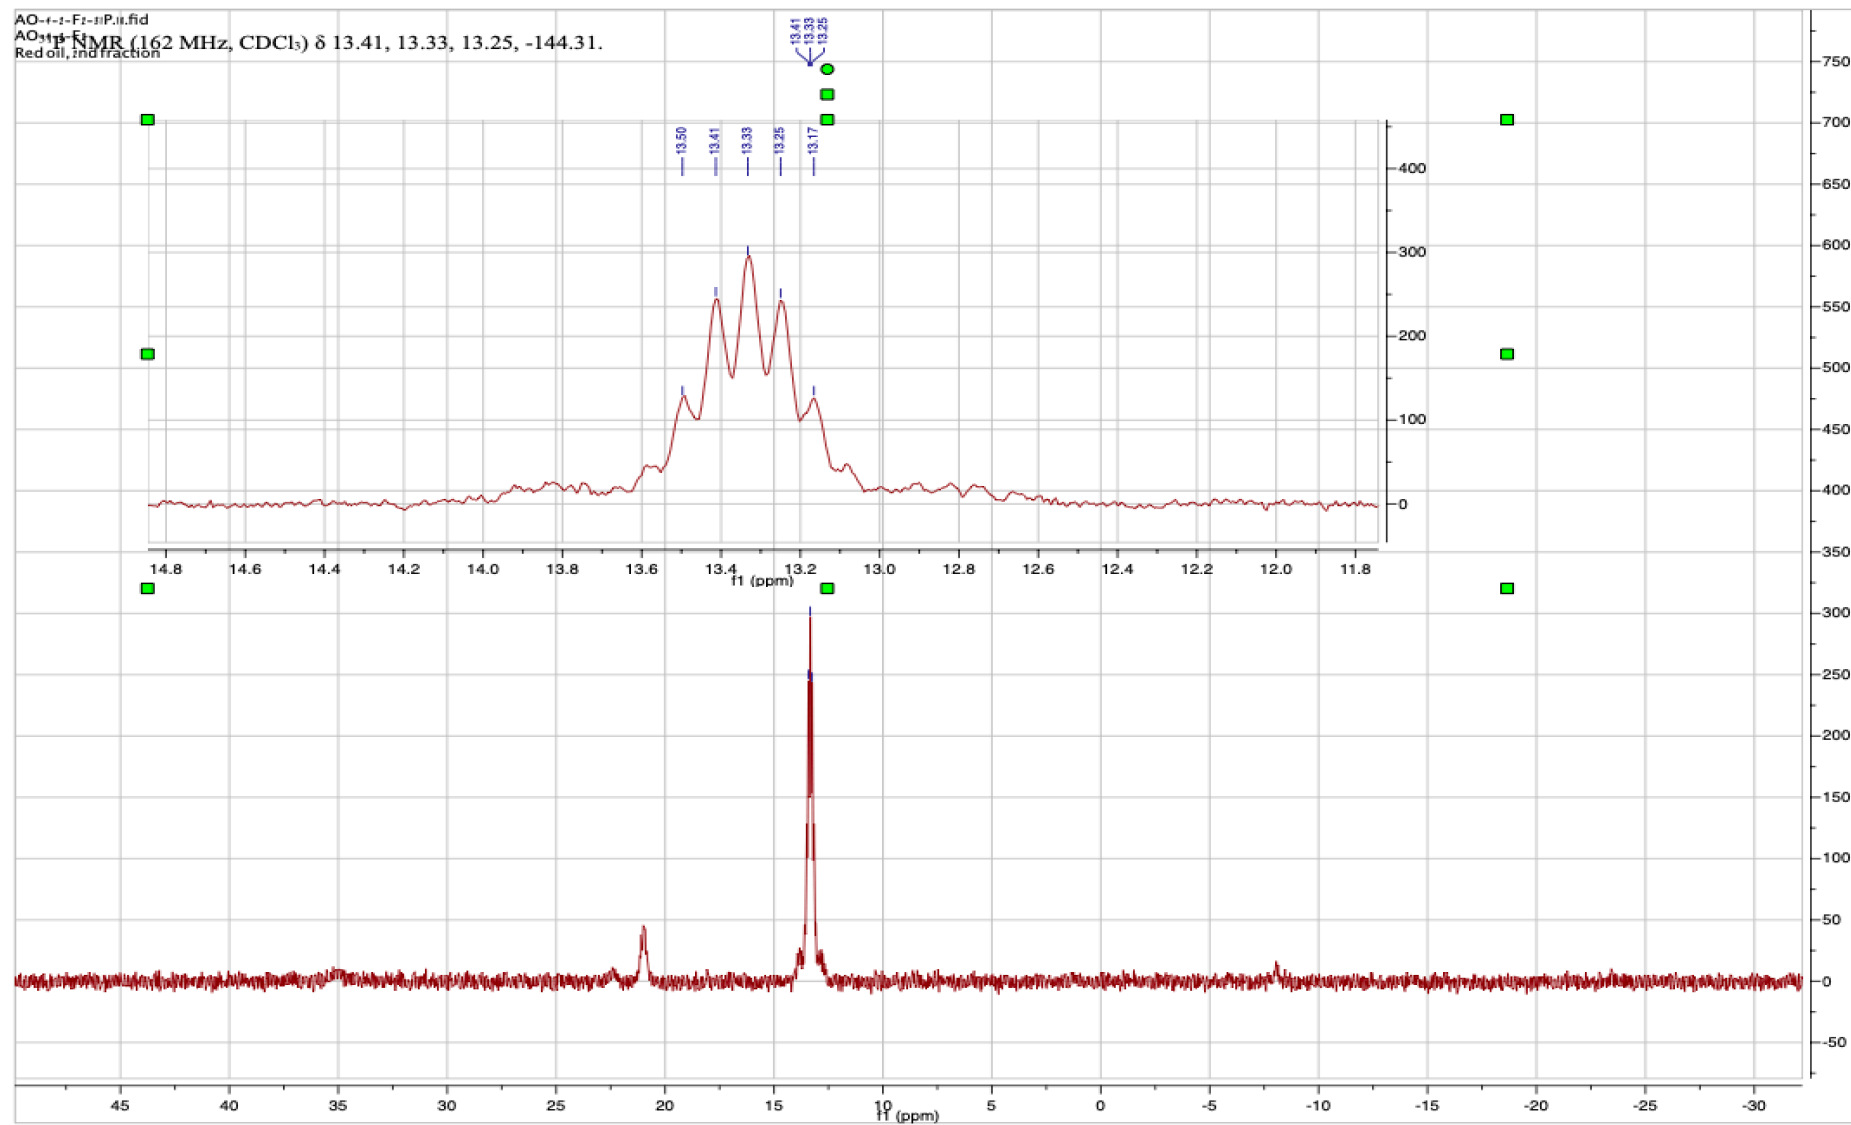

**Figure S4.**  $^1\text{H}$  NMR Spectrum of  $[\mathbf{4}]\text{PF}_6$ 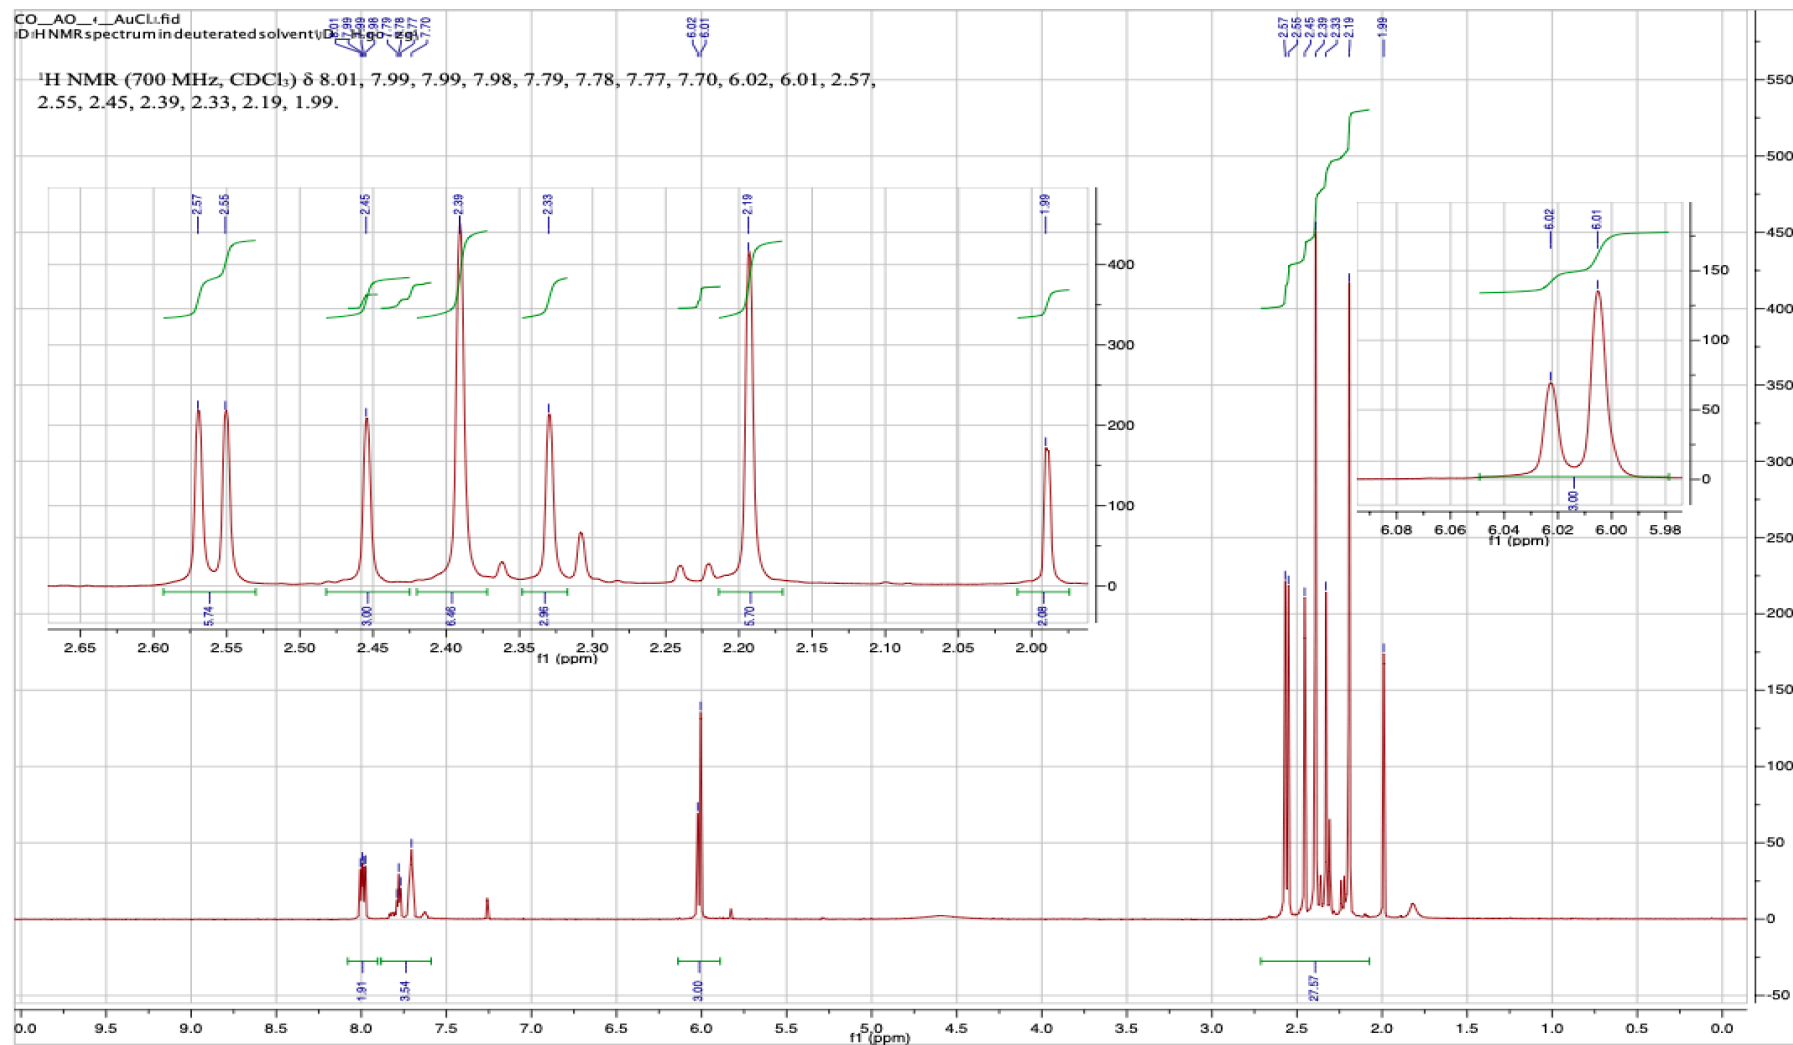

**Figure S5.**  $^{13}\text{C}\{^1\text{H}\}$  NMR Spectrum of  $[\text{4}]\text{PF}_6$ 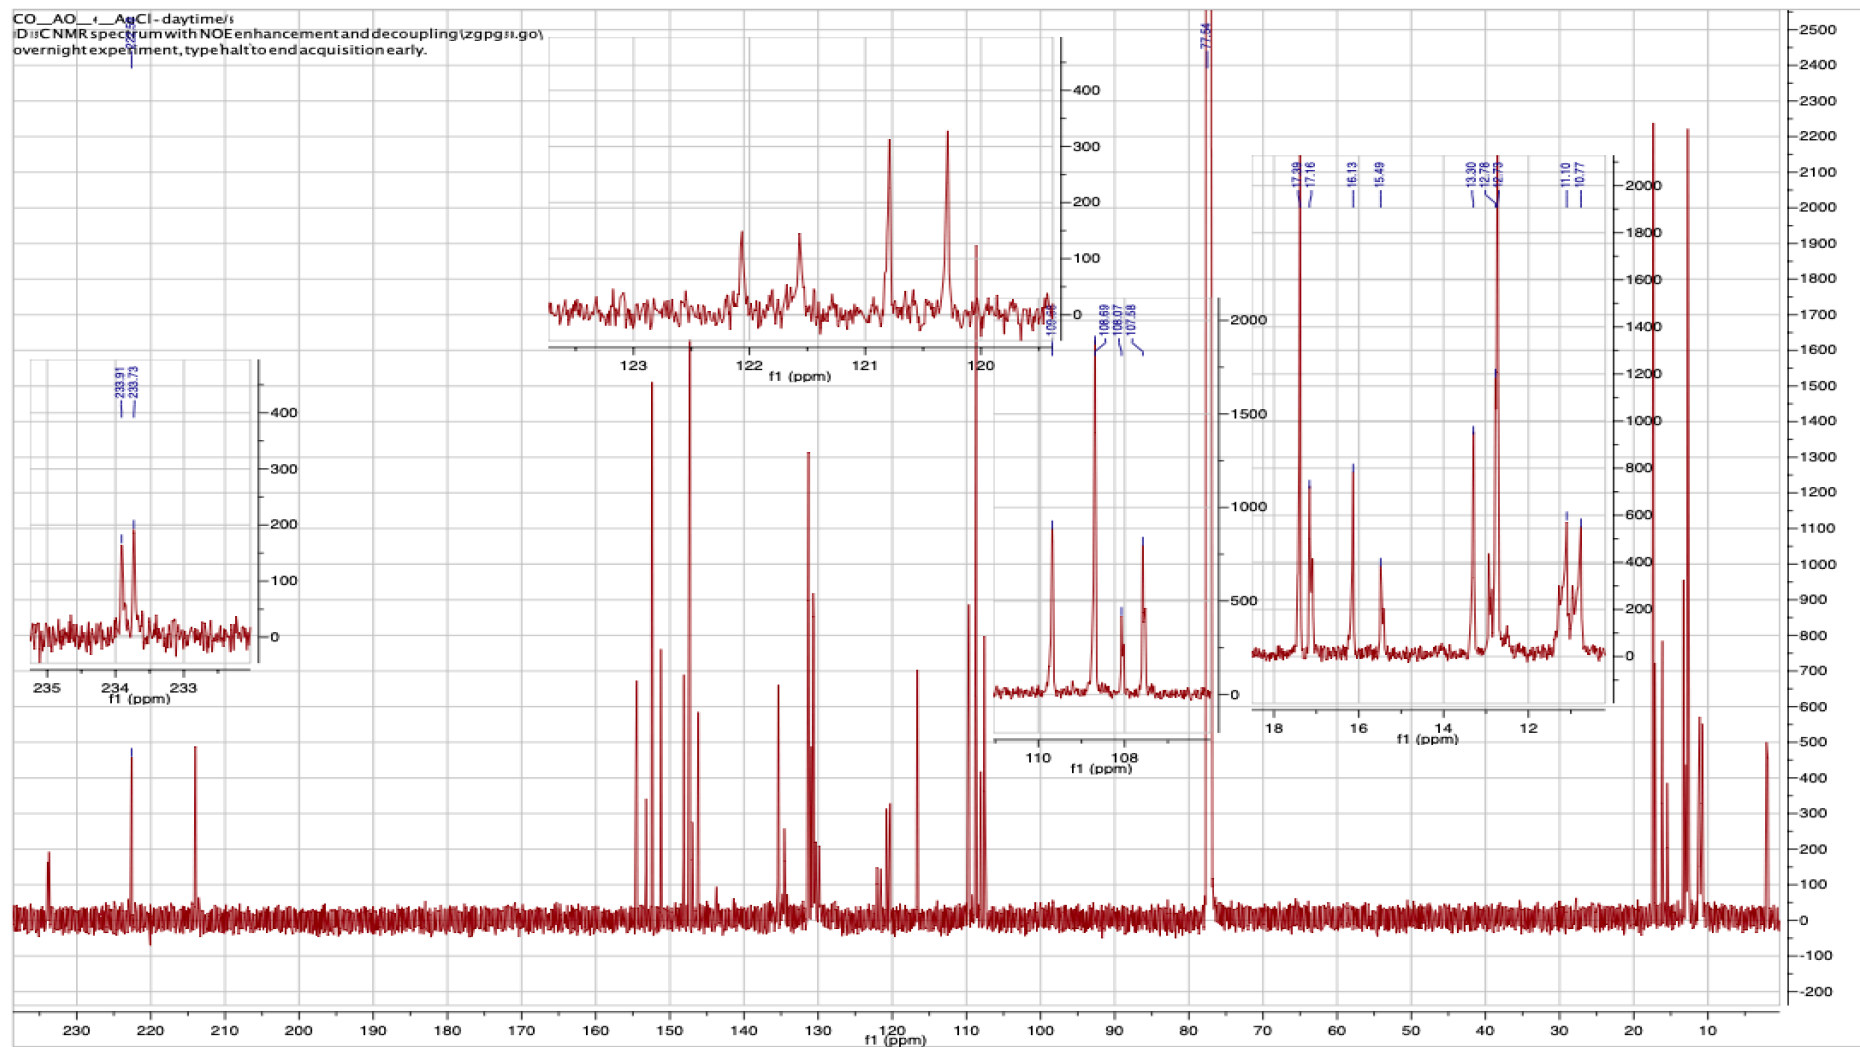

**Figure S6.**  $^{31}\text{P}\{^1\text{H}\}$  NMR Spectrum of  $[\mathbf{4}]\text{PF}_6$  ( $\delta_{\text{P}} = 13.7 = [\mathbf{1a}]^+$ )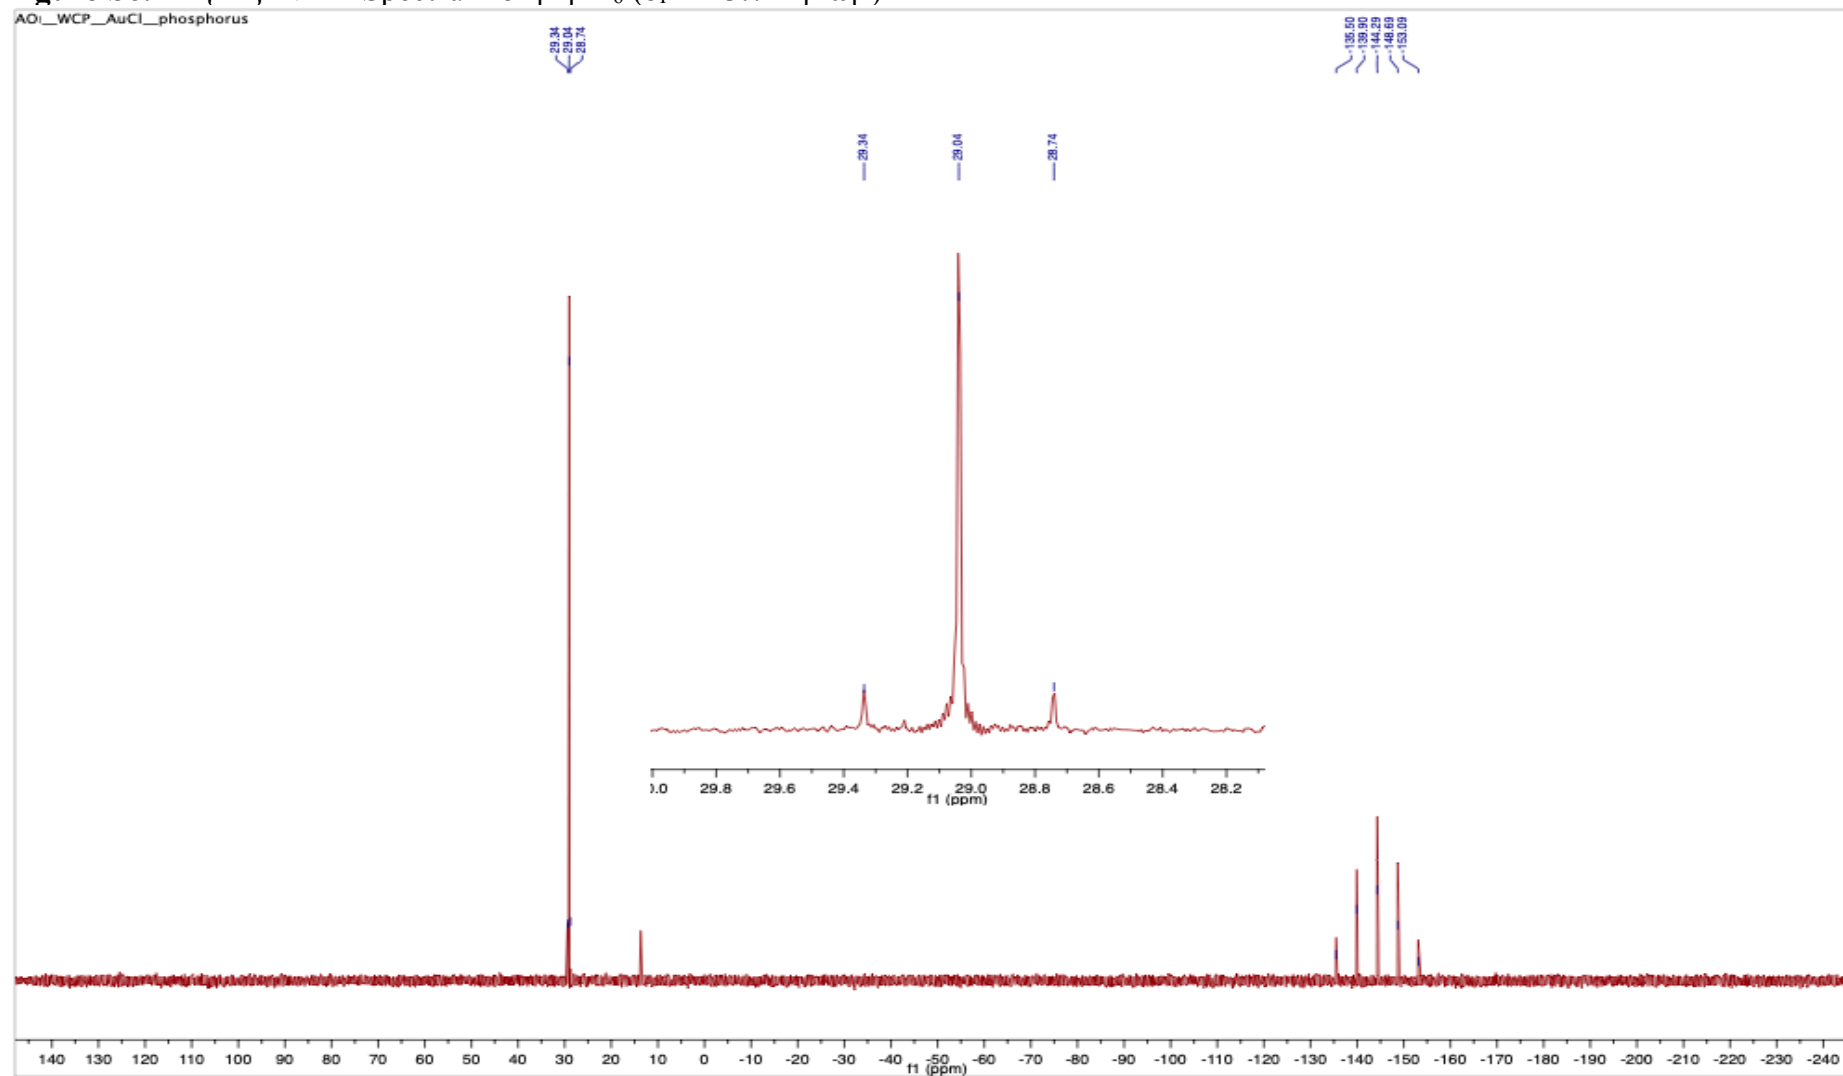

**Figure S7.**  $^1\text{H}$  NMR Spectrum (400 MHz) of  $[\mathbf{5}]\text{PF}_6$ 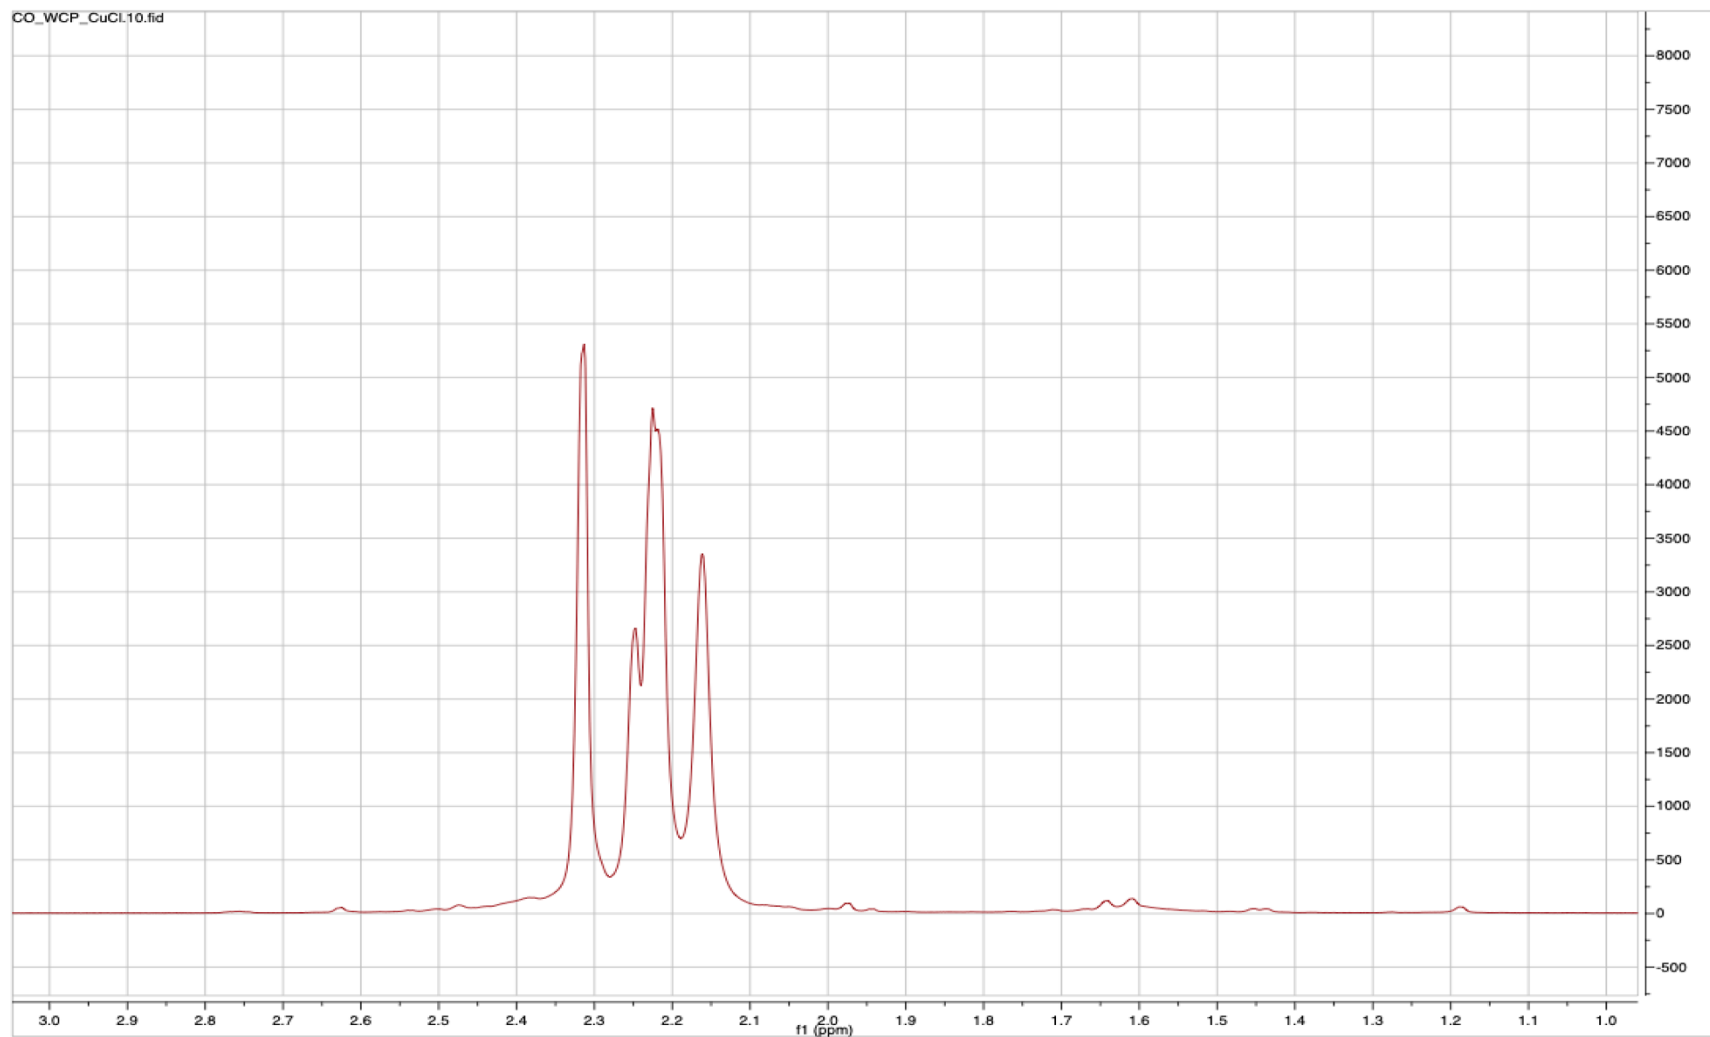



**Figure S8.**  $^1\text{H}$  NMR Spectrum (700 MHz) of  $[\mathbf{5}]\text{PF}_6$ 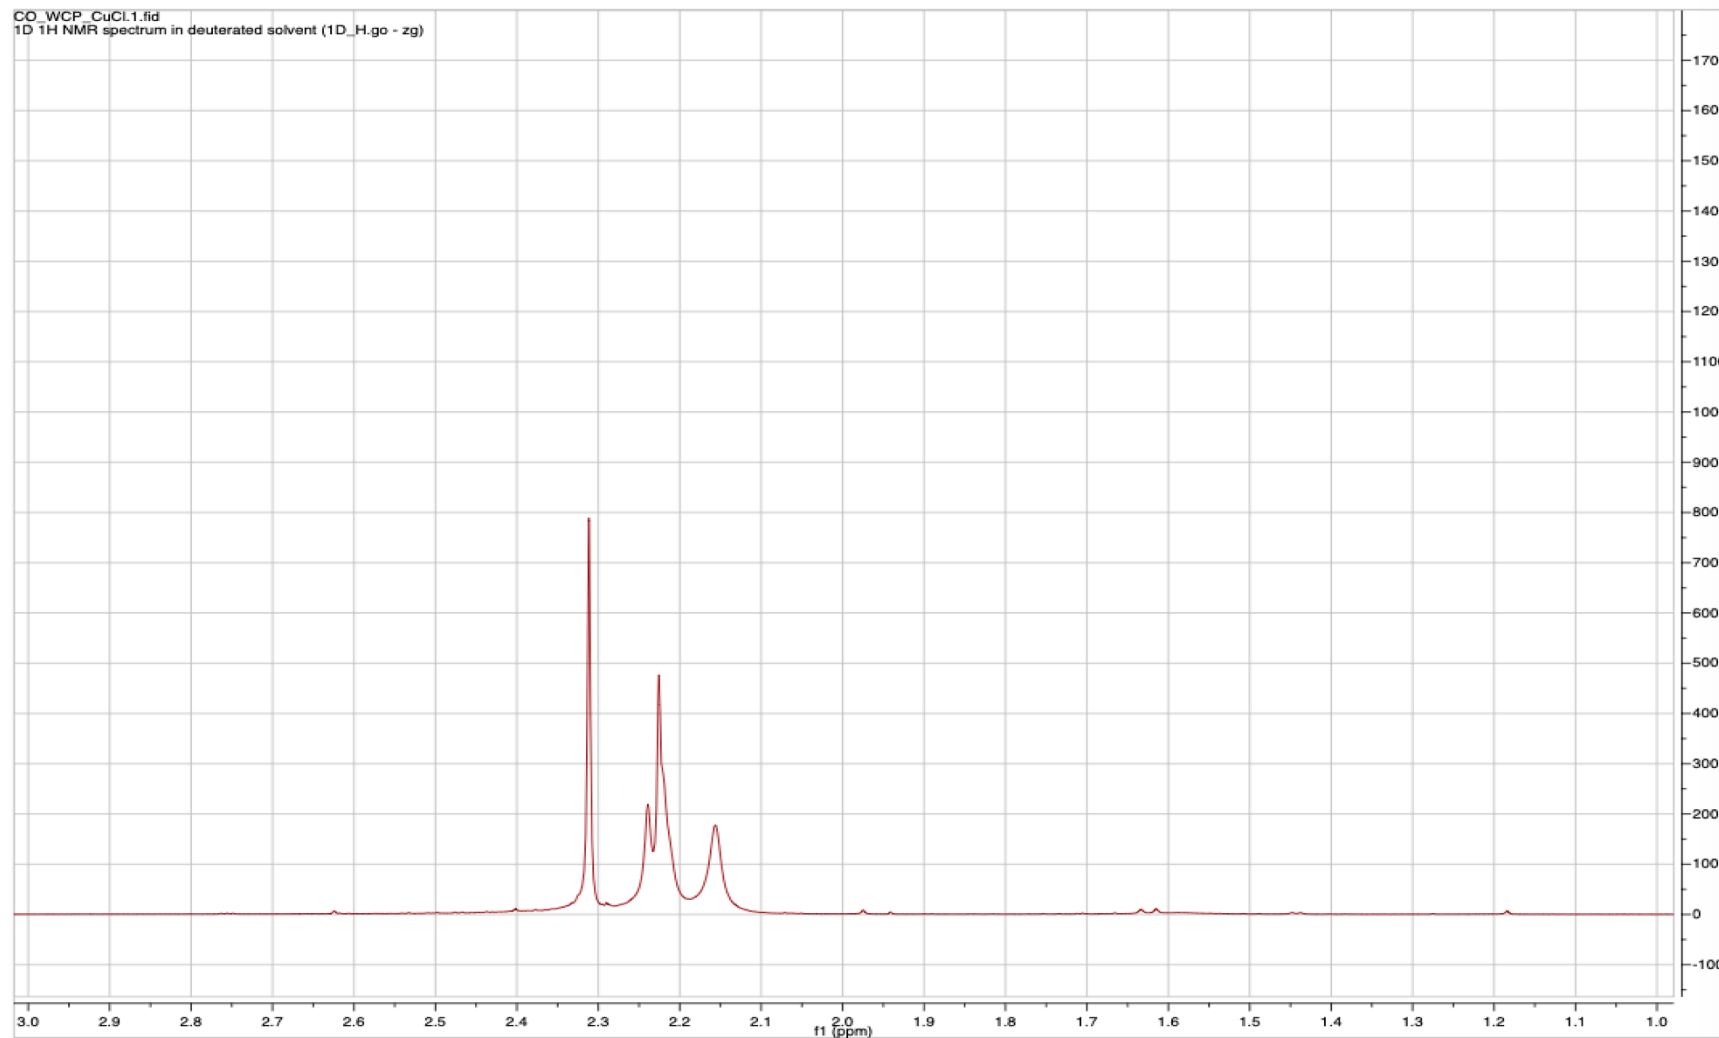

**Figure S9.**  $^1\text{H}$  NMR Spectrum (Full, 400 MHz) of  $[\mathbf{5}]\text{PF}_6$ 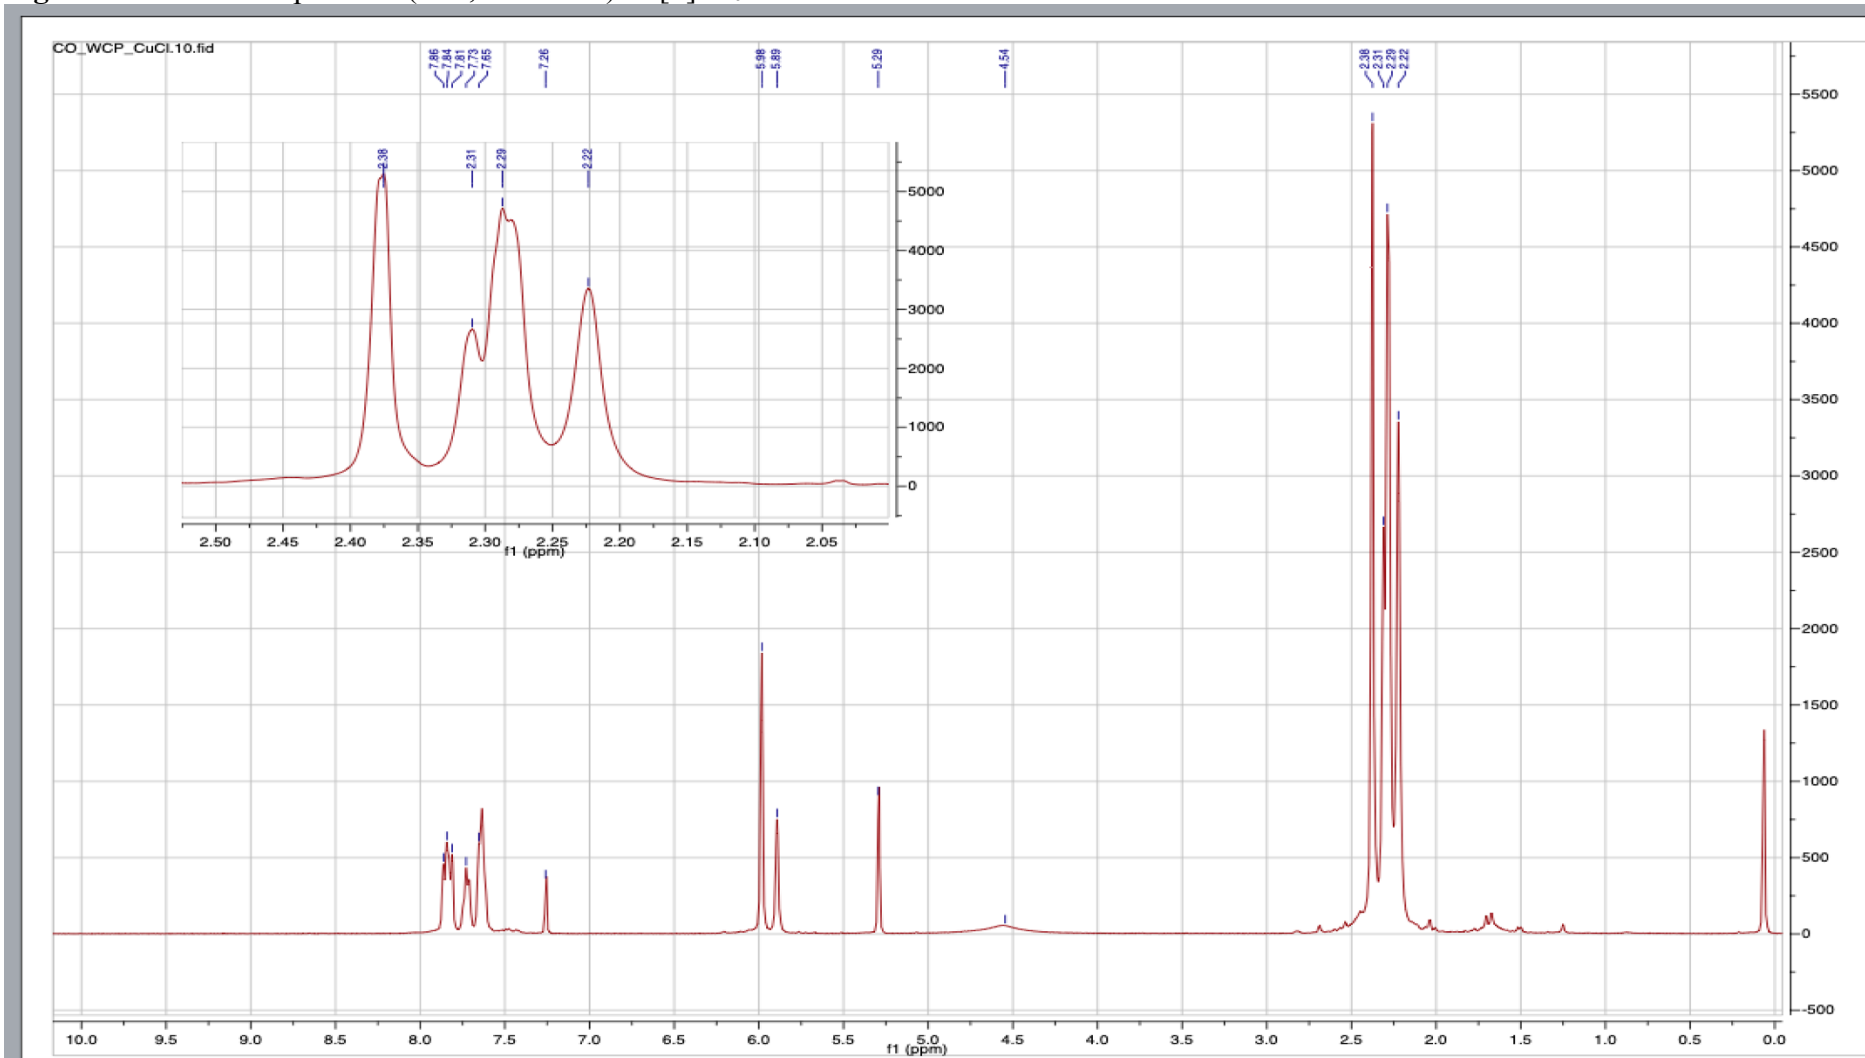

**Figure S10.**  $^{13}\text{C}\{^1\text{H}\}$  NMR Spectrum of [5]PF<sub>6</sub>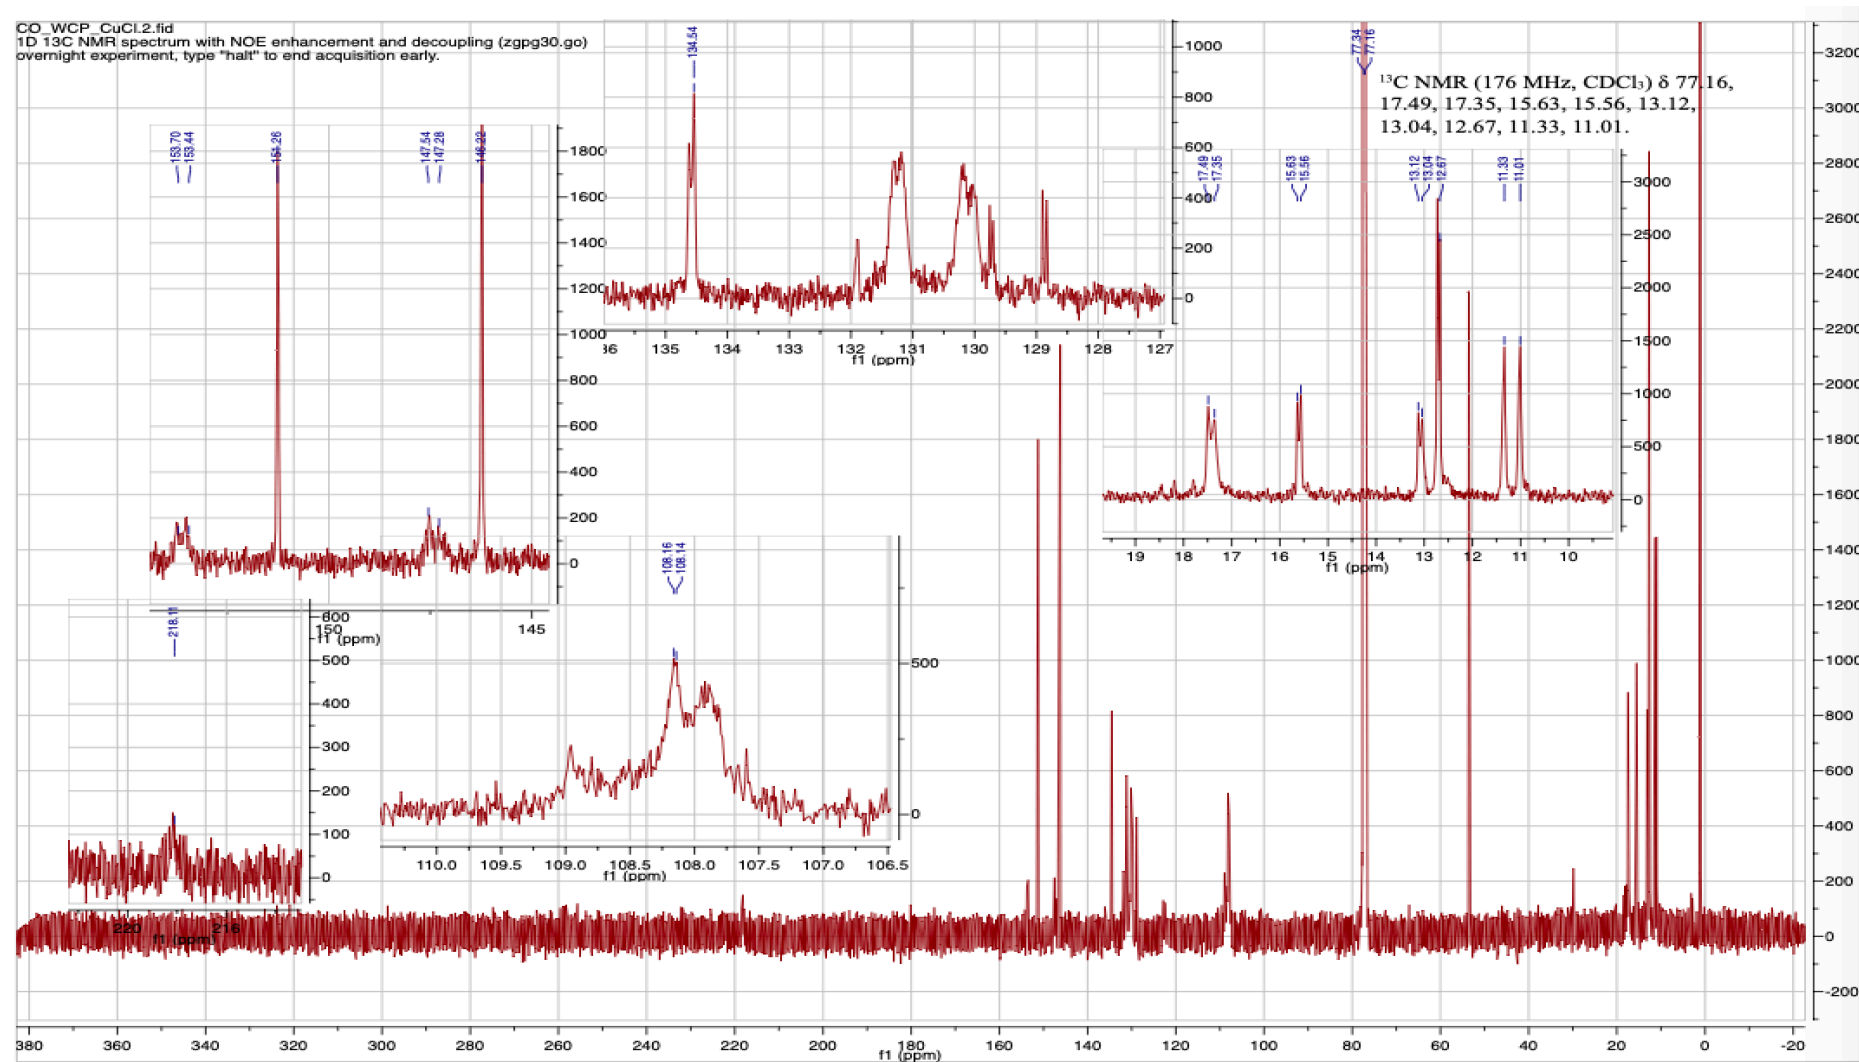

**Figure S11.**  $^{31}\text{P}\{^1\text{H}\}$  NMR Spectrum of  $[\mathbf{5}]\text{PF}_6$ 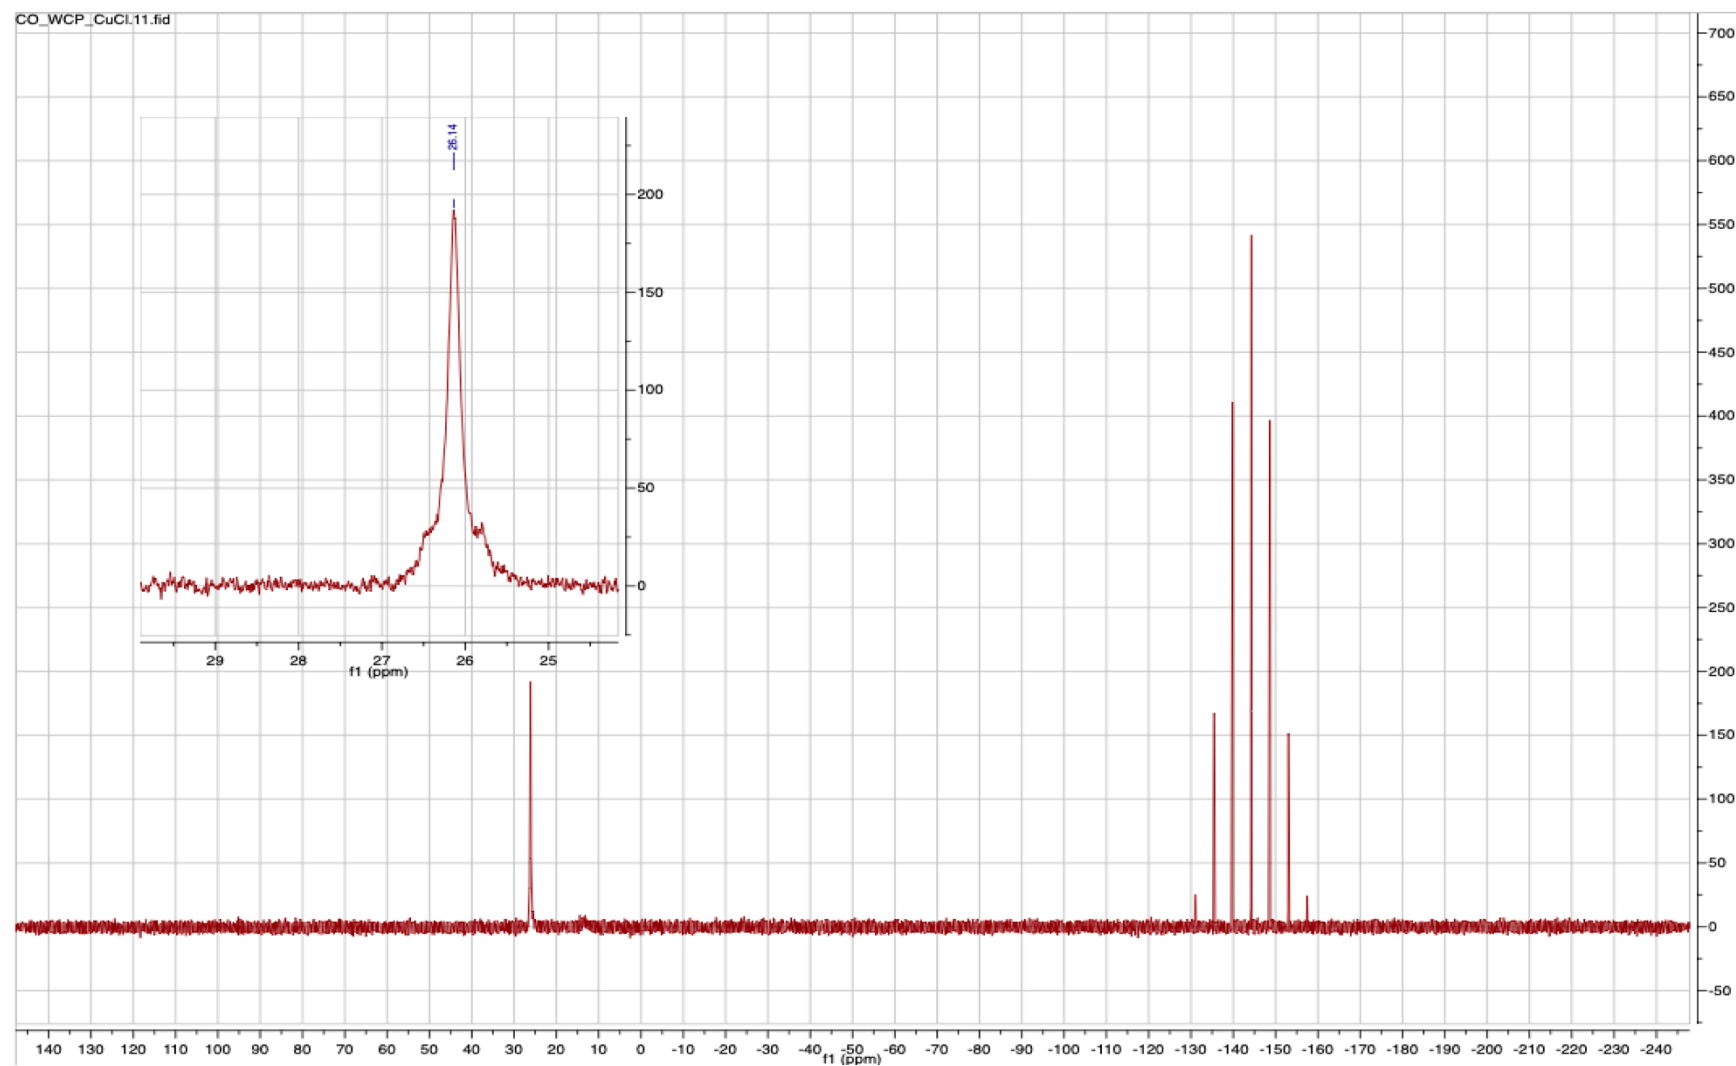

Figure S12. ESI Mass Spectra of [5]PF<sub>6</sub>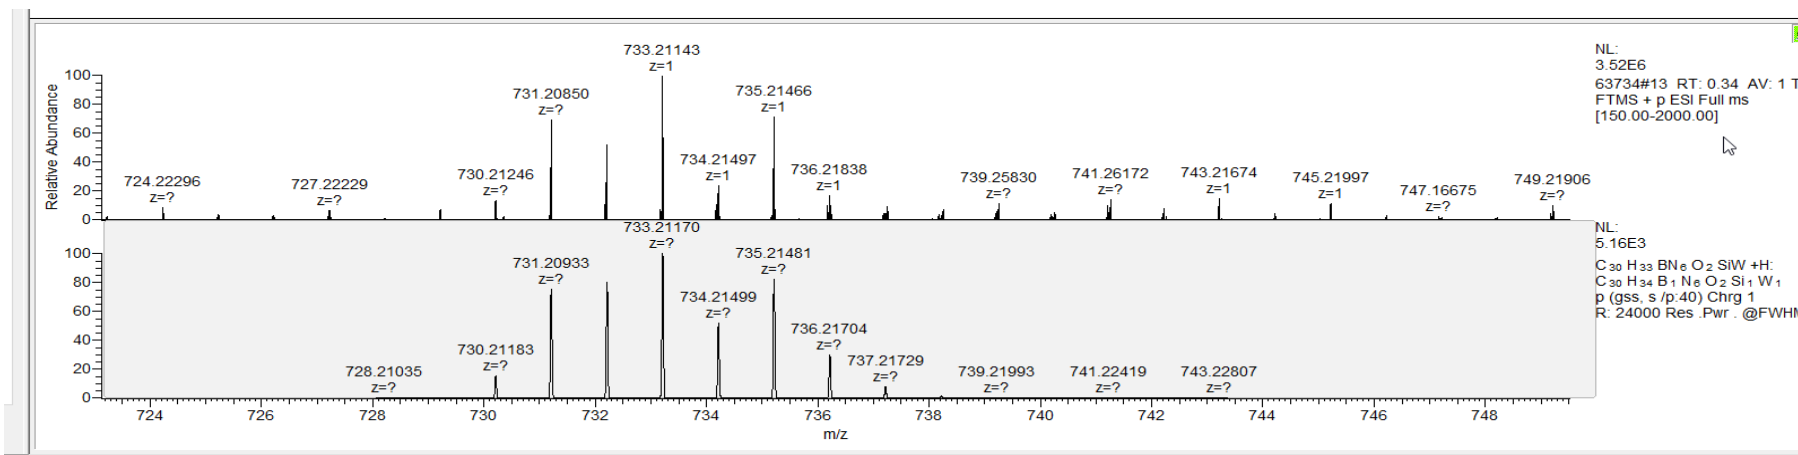(a) Observed versus simulated spectrum for detected target formulas [M+H]<sup>+</sup> & (M+Na)<sup>+</sup> ions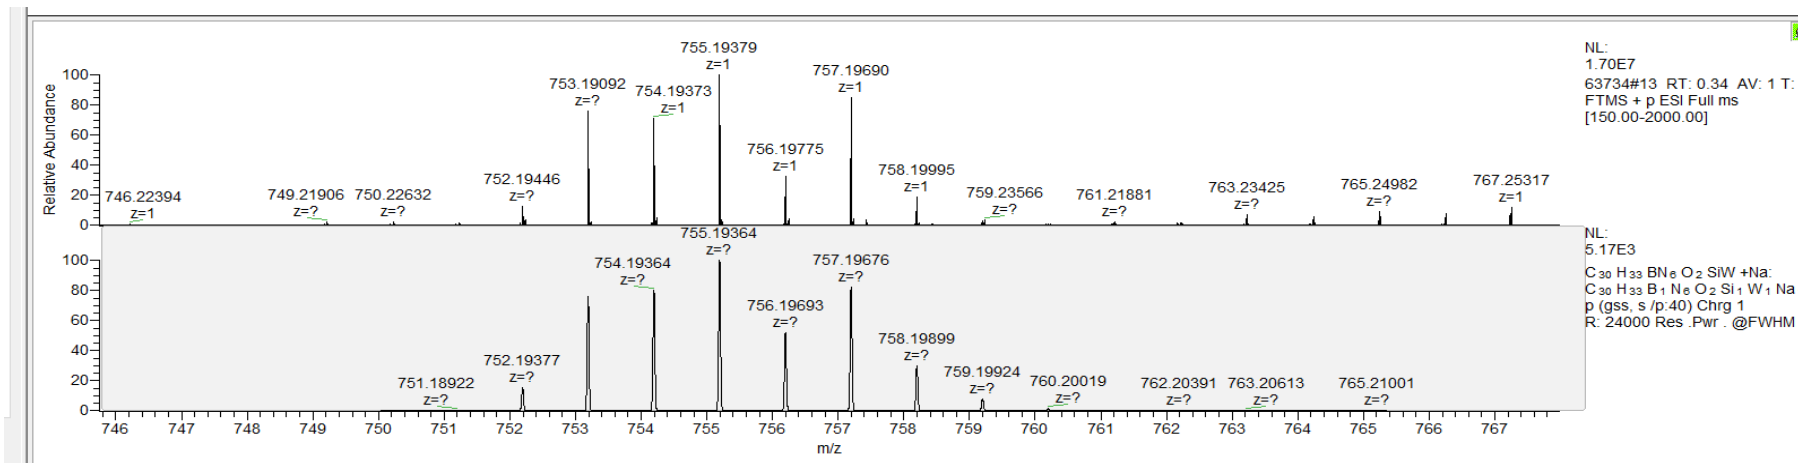

**(b) Full Spectra:**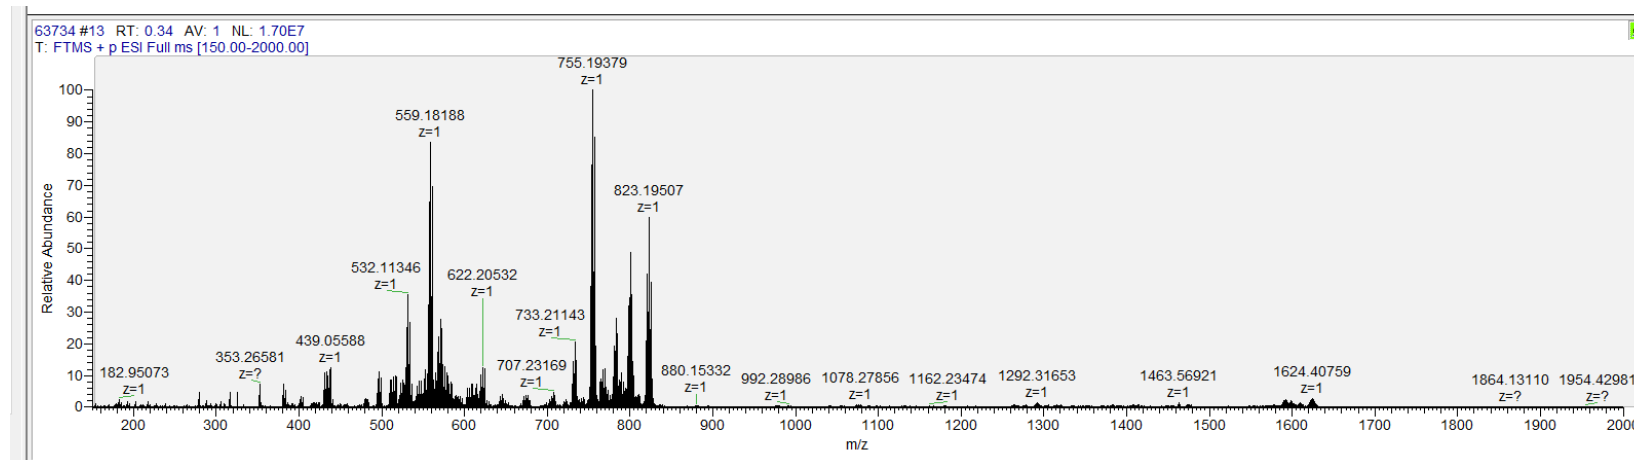

Time (min)

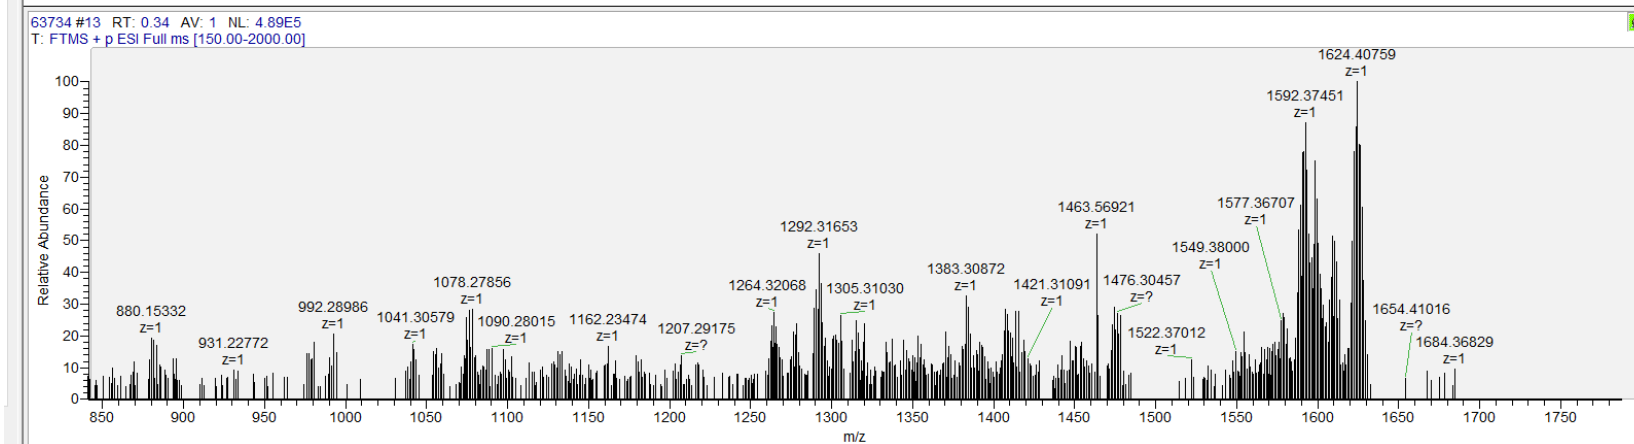

**Figure S13.**  $^1\text{H}$  NMR Spectrum of [6]PF<sub>6</sub>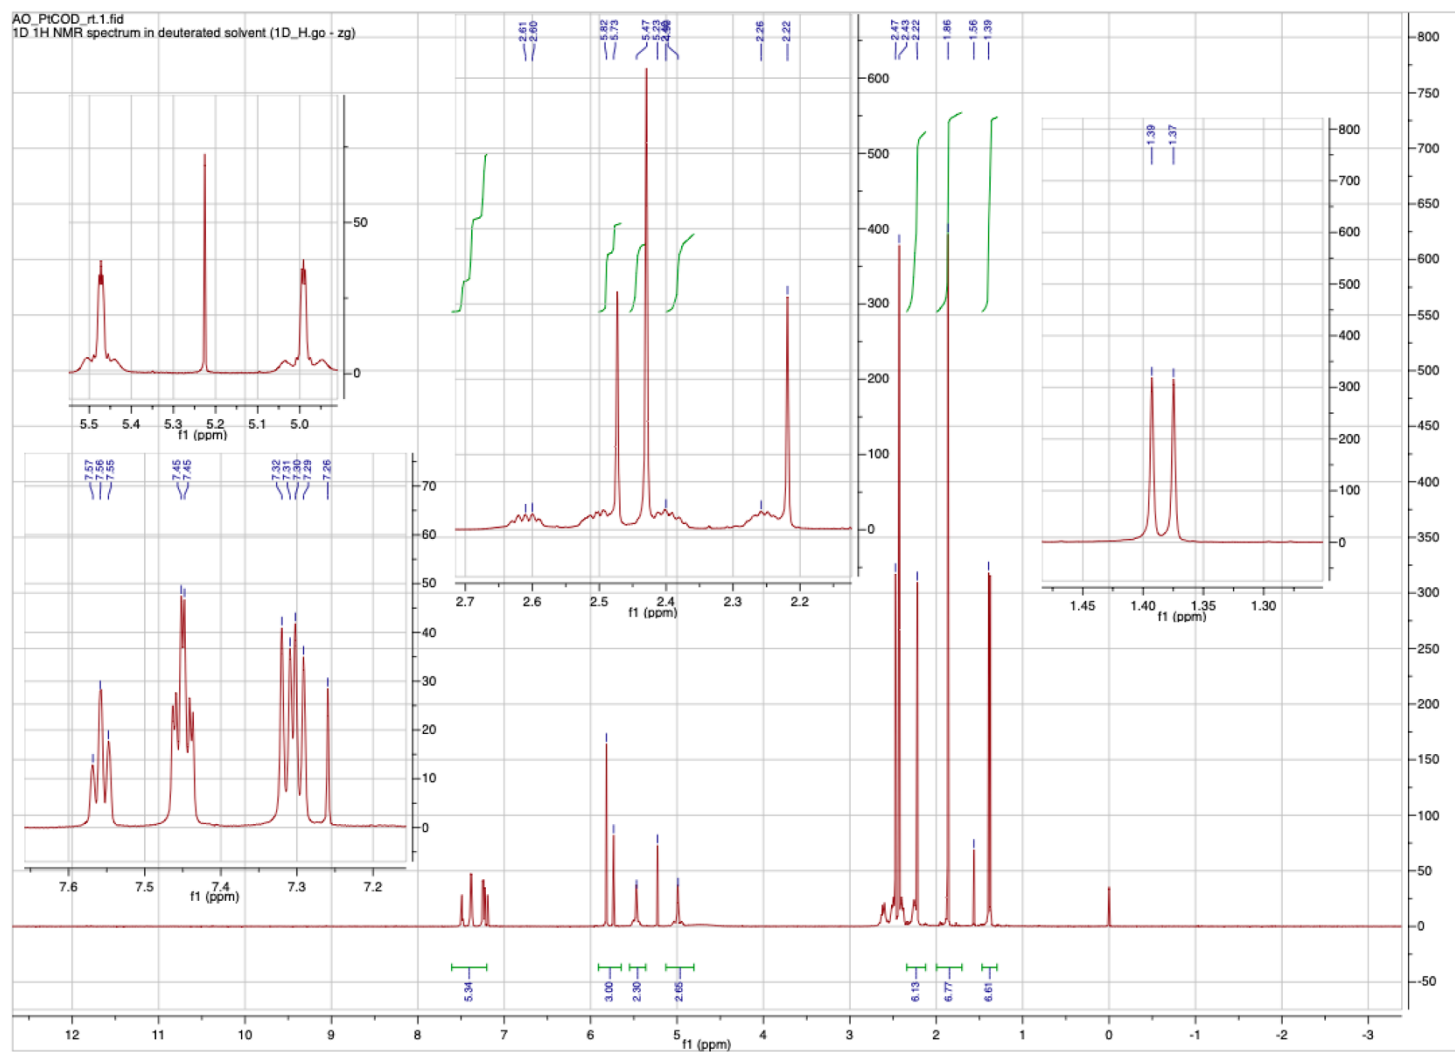

**Figure S14.**  $^{13}\text{C}\{^1\text{H}\}$  NMR Spectrum of  $[\mathbf{6}]\text{PF}_6$ 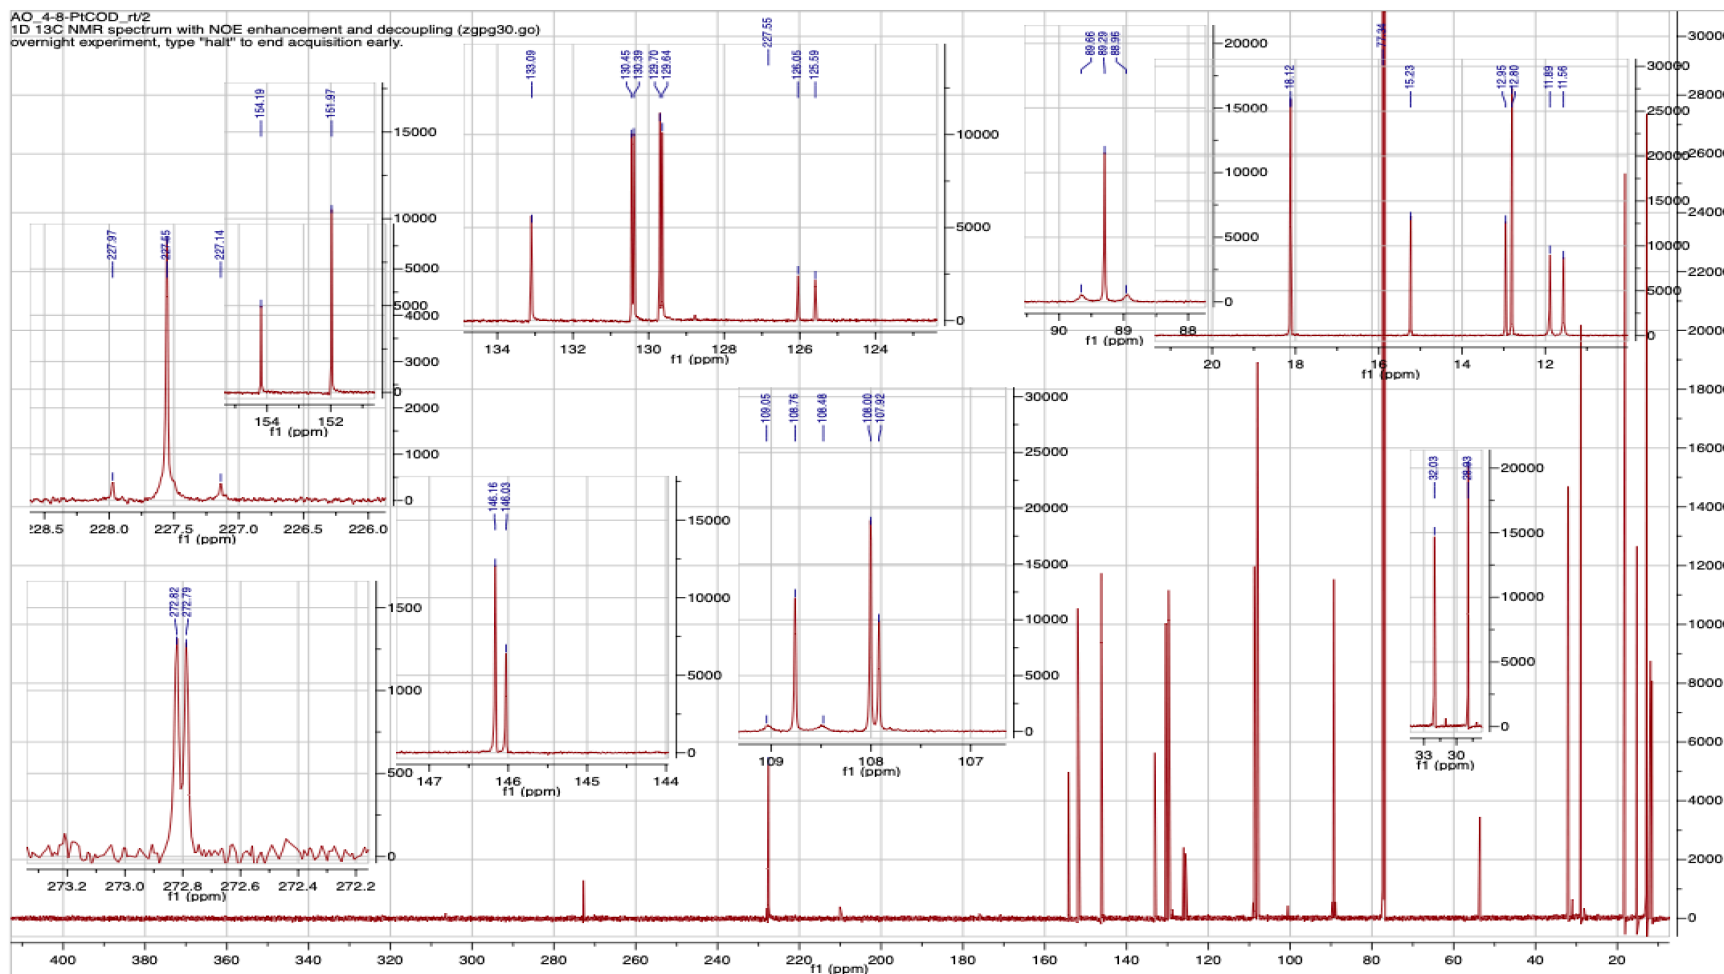



**Figure S15.**  $^{31}\text{P}$  (proton coupled) NMR Spectrum of  $[\mathbf{6}]\text{PF}_6$ 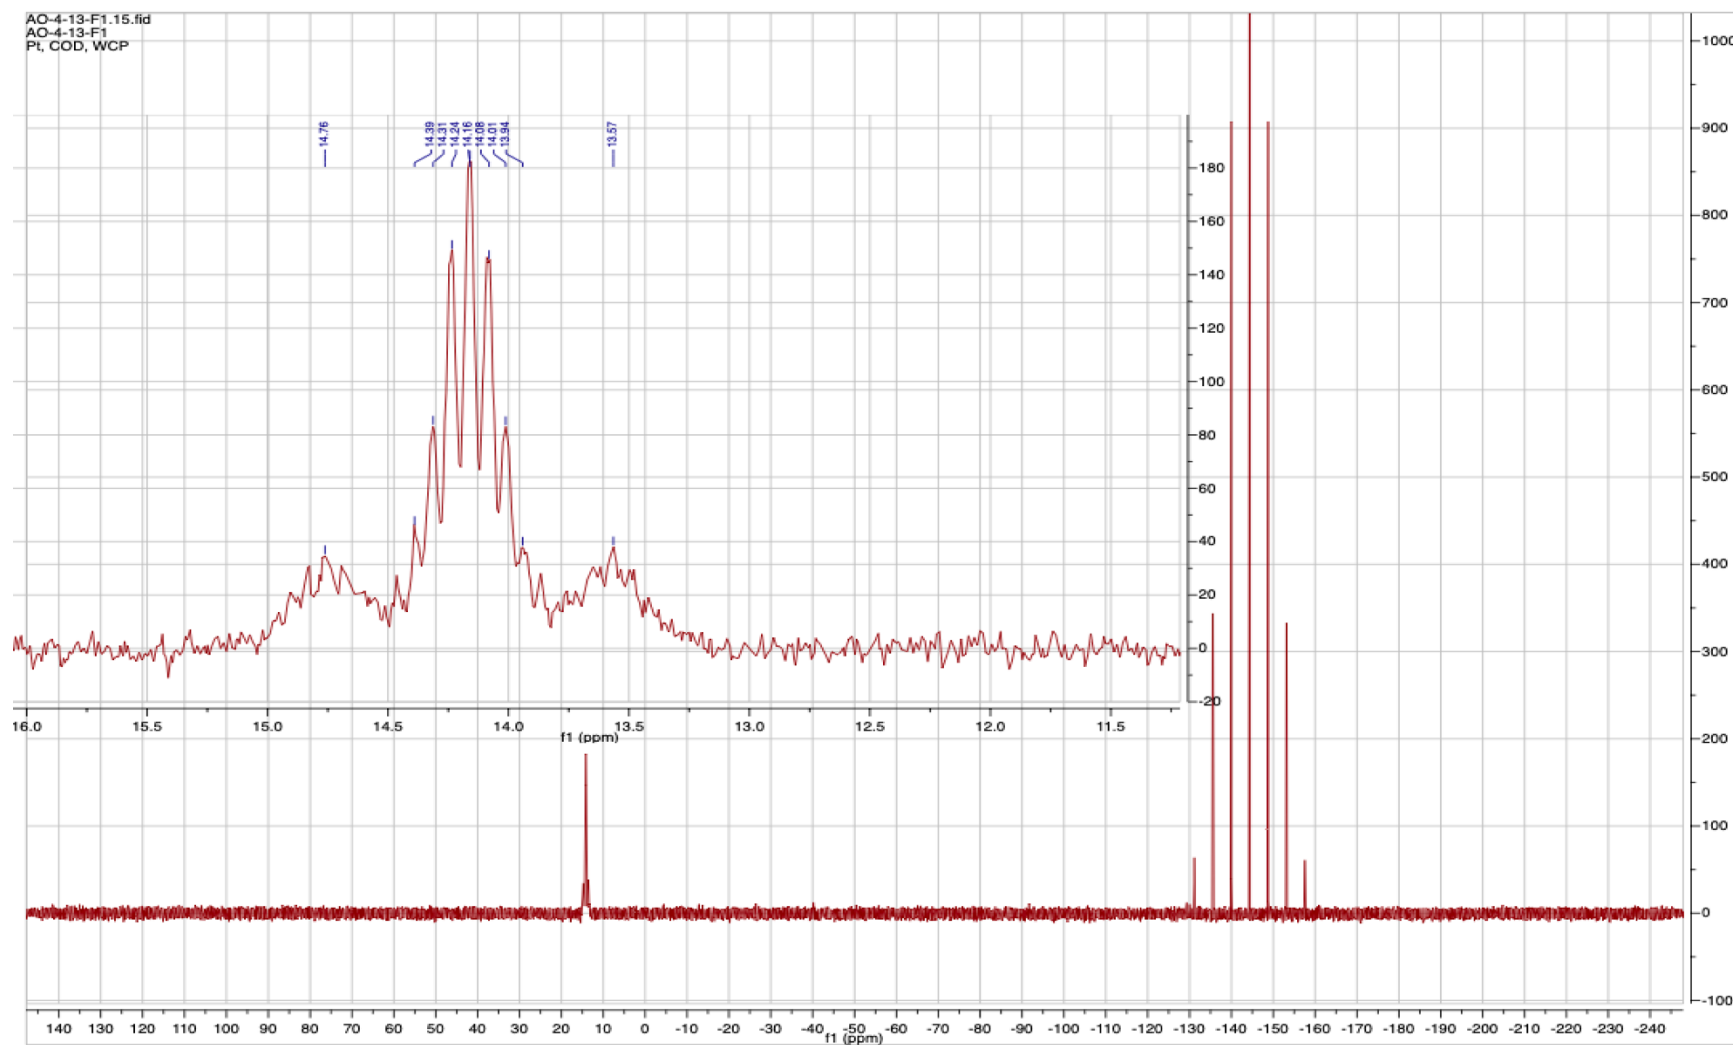

**Figure S16.**  $^{31}\text{P}\{^1\text{H}\}$  NMR Spectrum of  $[\mathbf{6}]\text{PF}_6$ 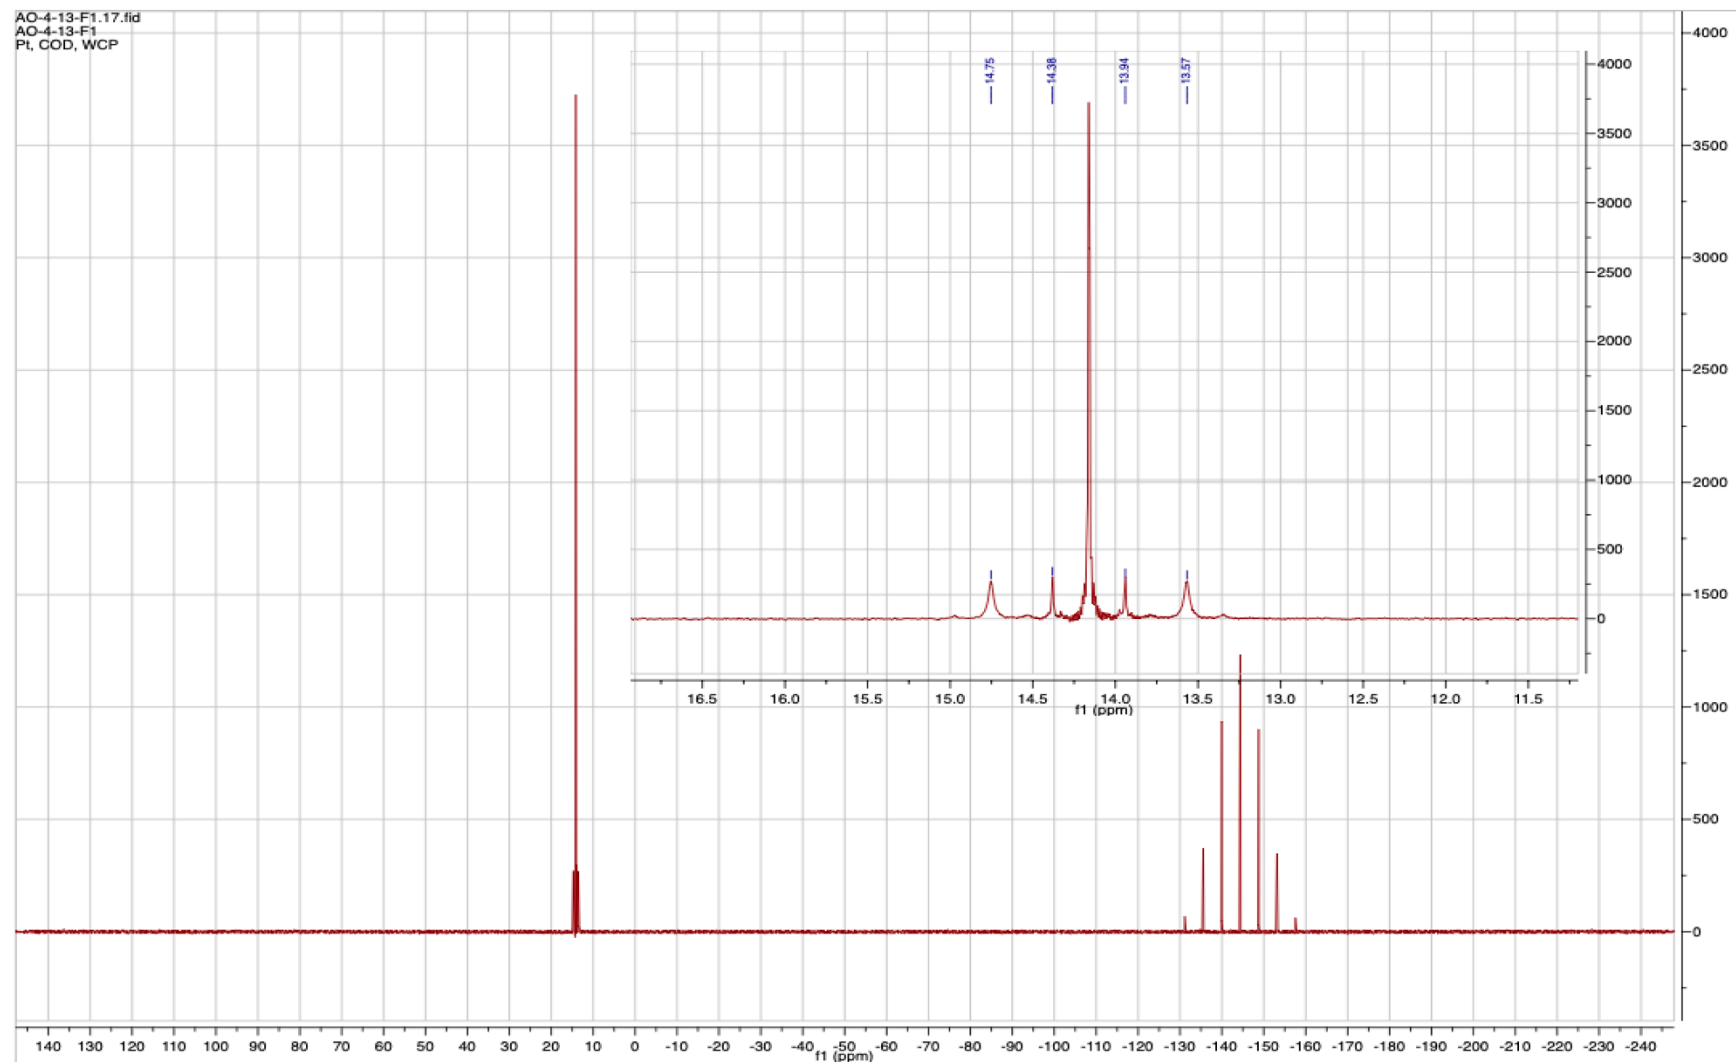

**Figure S17.**  $^{13}\text{C}$ - $^1\text{H}$  HSQC NMR Spectrum of  $[\mathbf{6}]\text{PF}_6$ 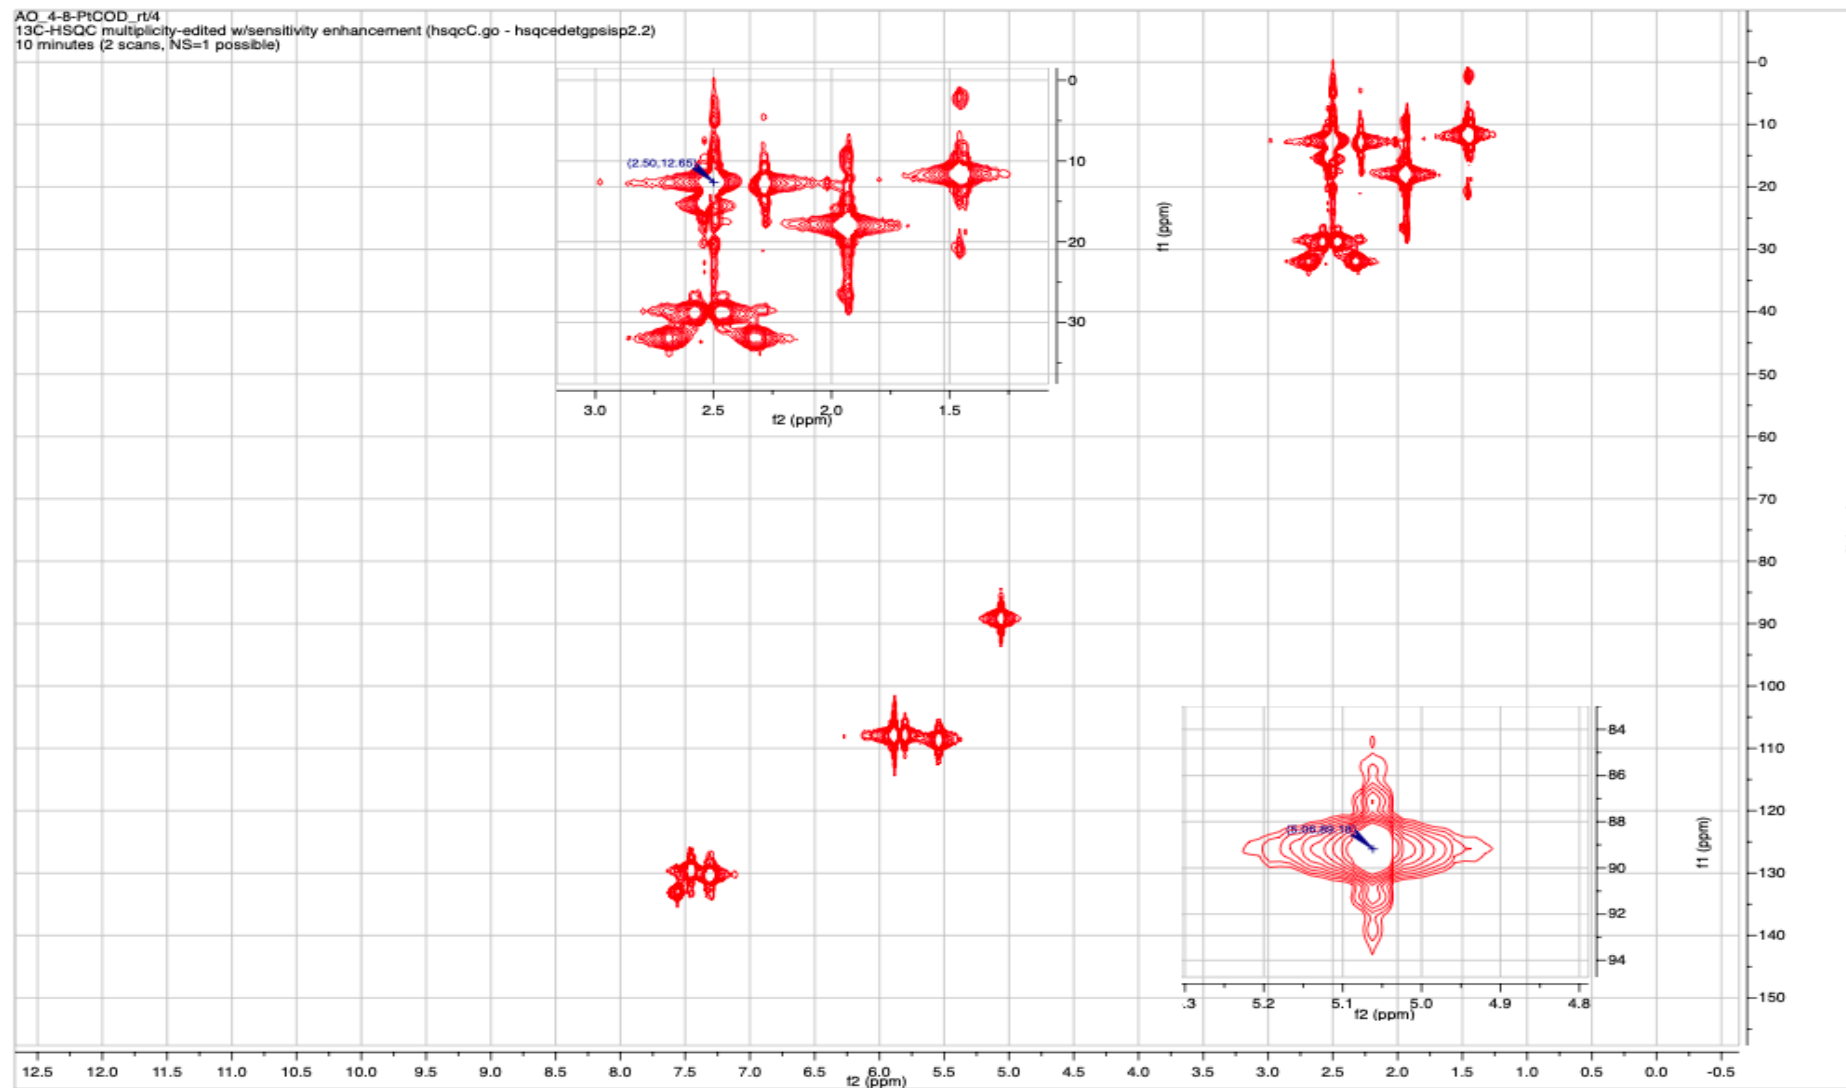

**Figure S18.**  $^{13}\text{C}$ - $^1\text{H}$  HMBC NMR Spectrum of [6]PF<sub>6</sub>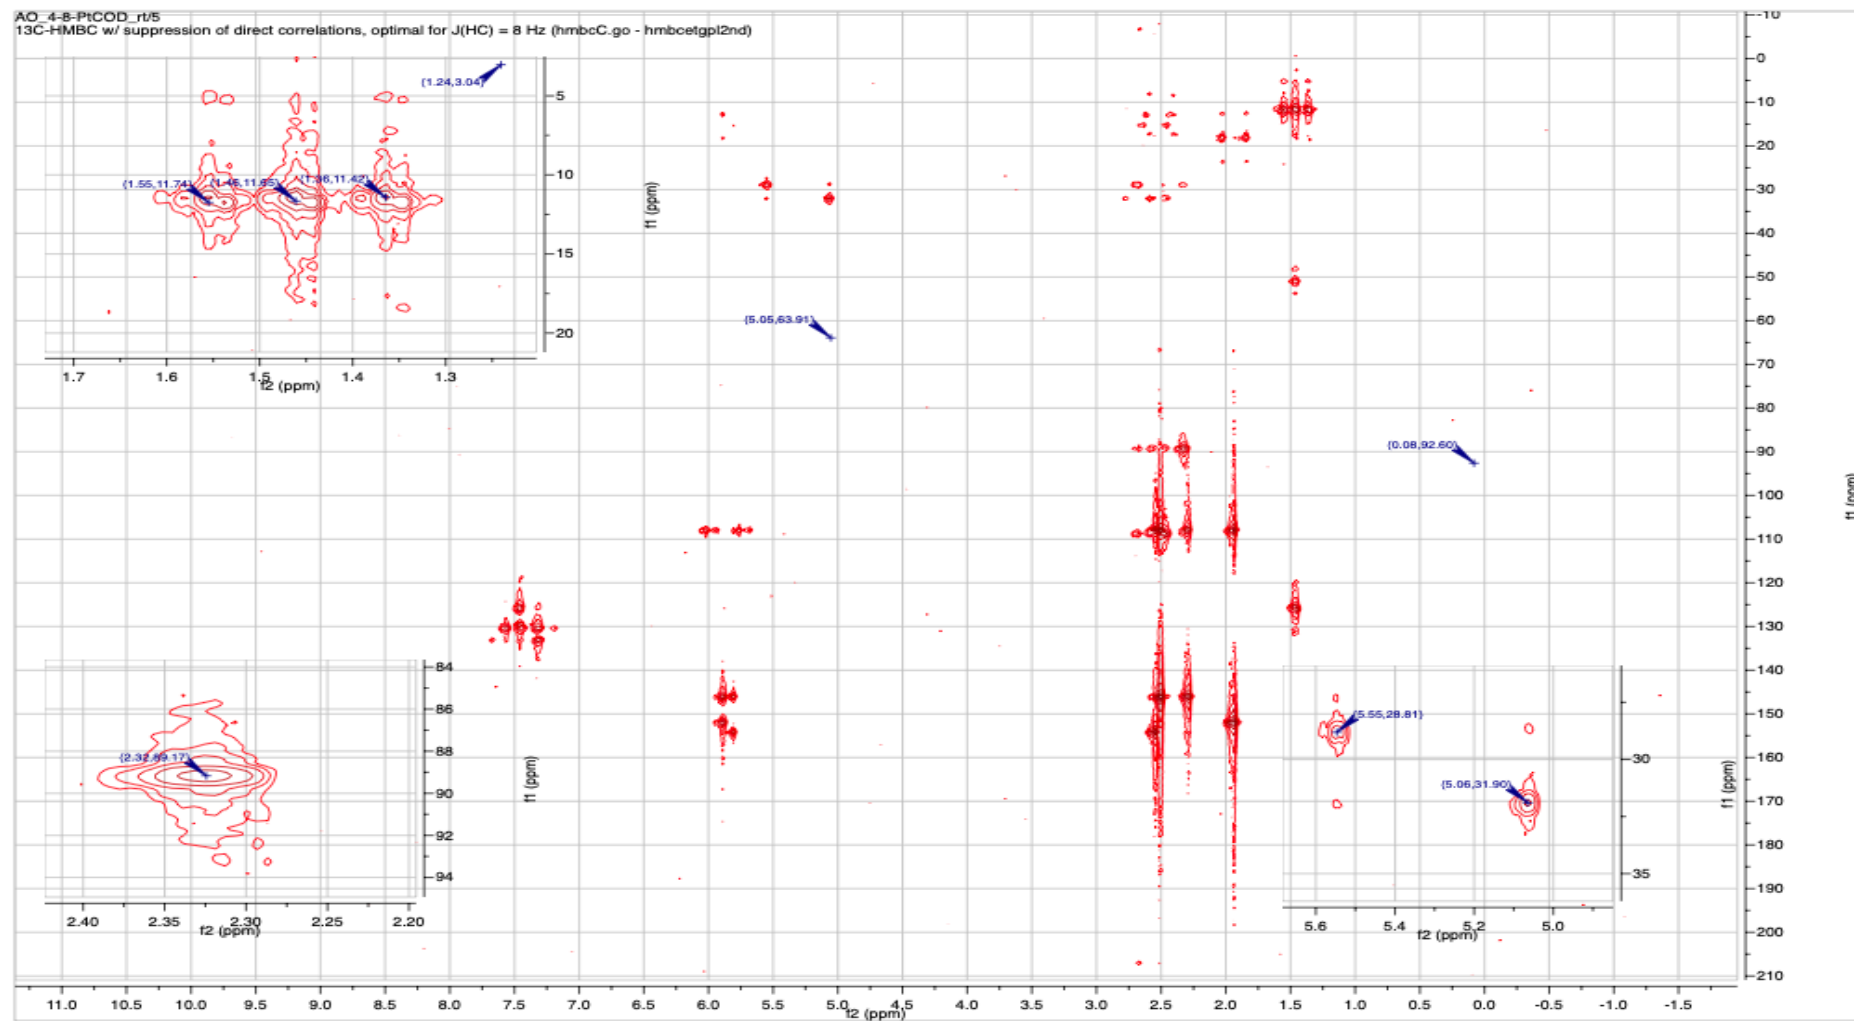

**Figure S19.**  $^1\text{H}$ - $^1\text{H}$  DQF-COSY NMR Spectrum of  $[\mathbf{6}]\text{PF}_6$ 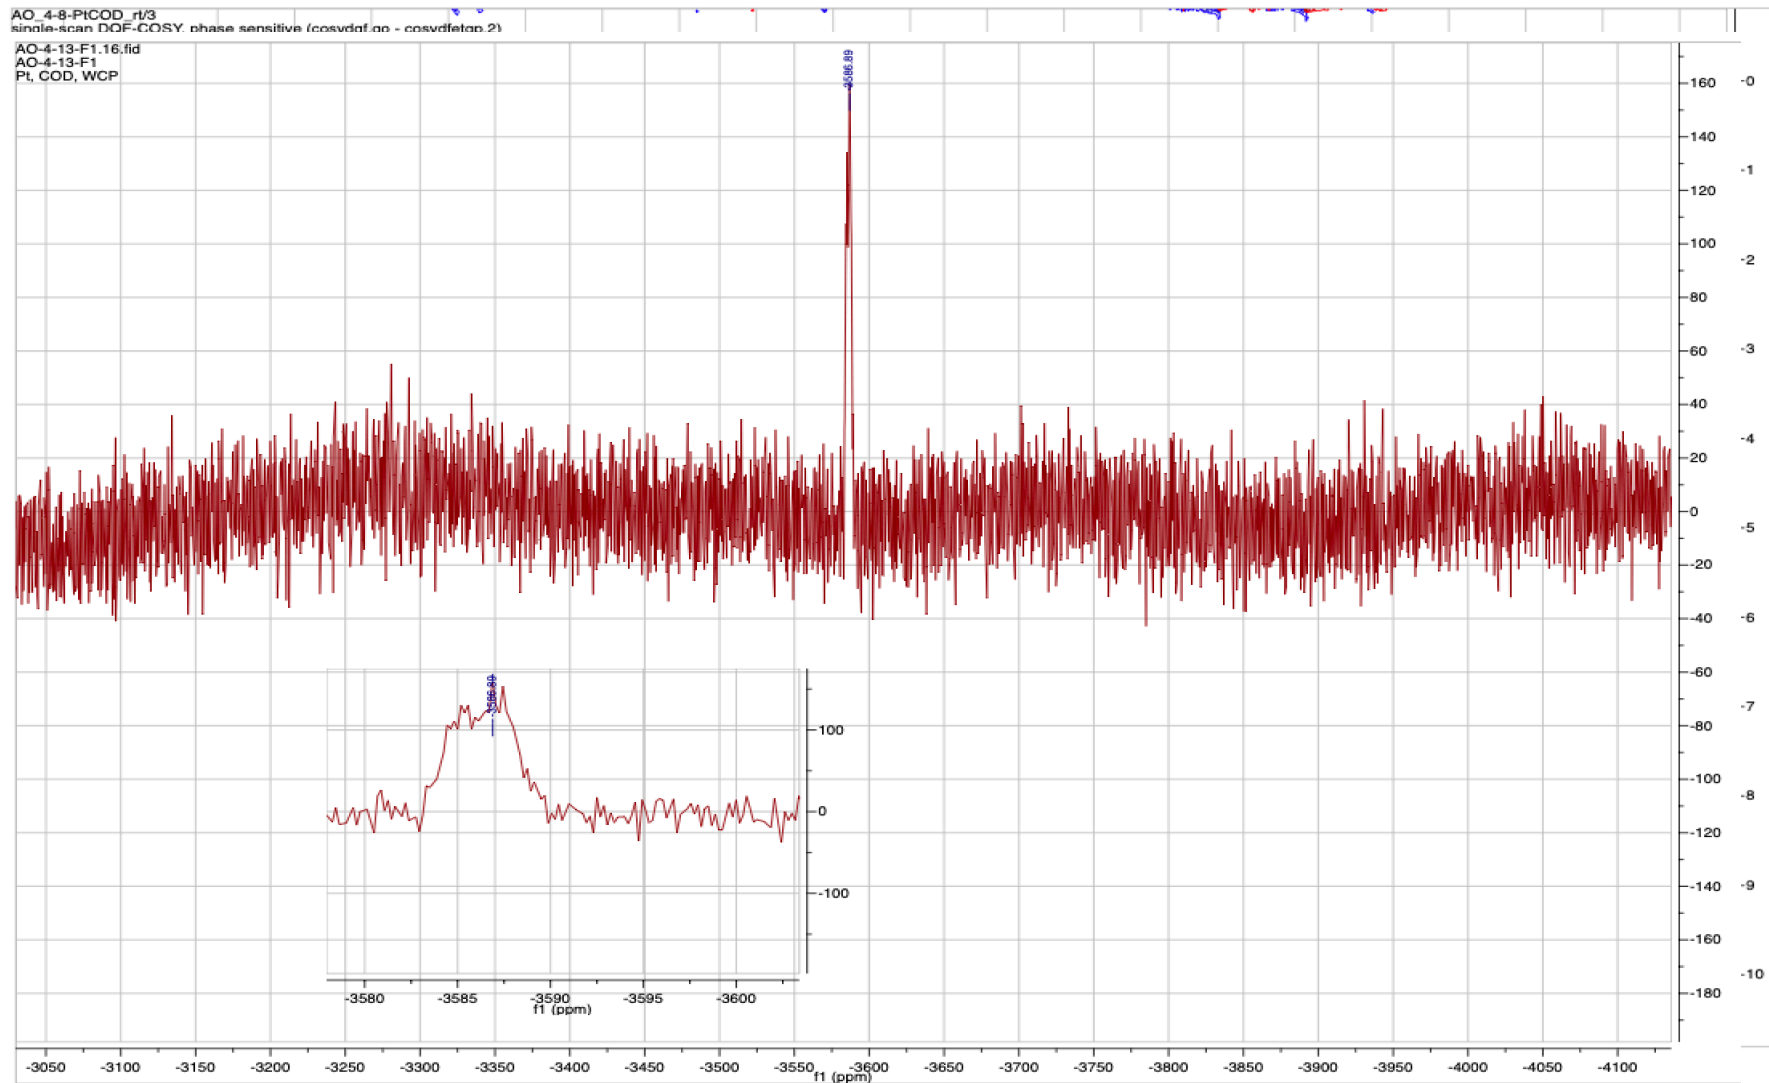**Figure S19.**  $^{193}\text{Pt}\{^1\text{H}\}$  NMR Spectrum of  $[\mathbf{6}]\text{PF}_6$

**Figure S20.**  $^1\text{H}$  NMR Spectrum of  $[\mathbf{7}]\text{PF}_6$ 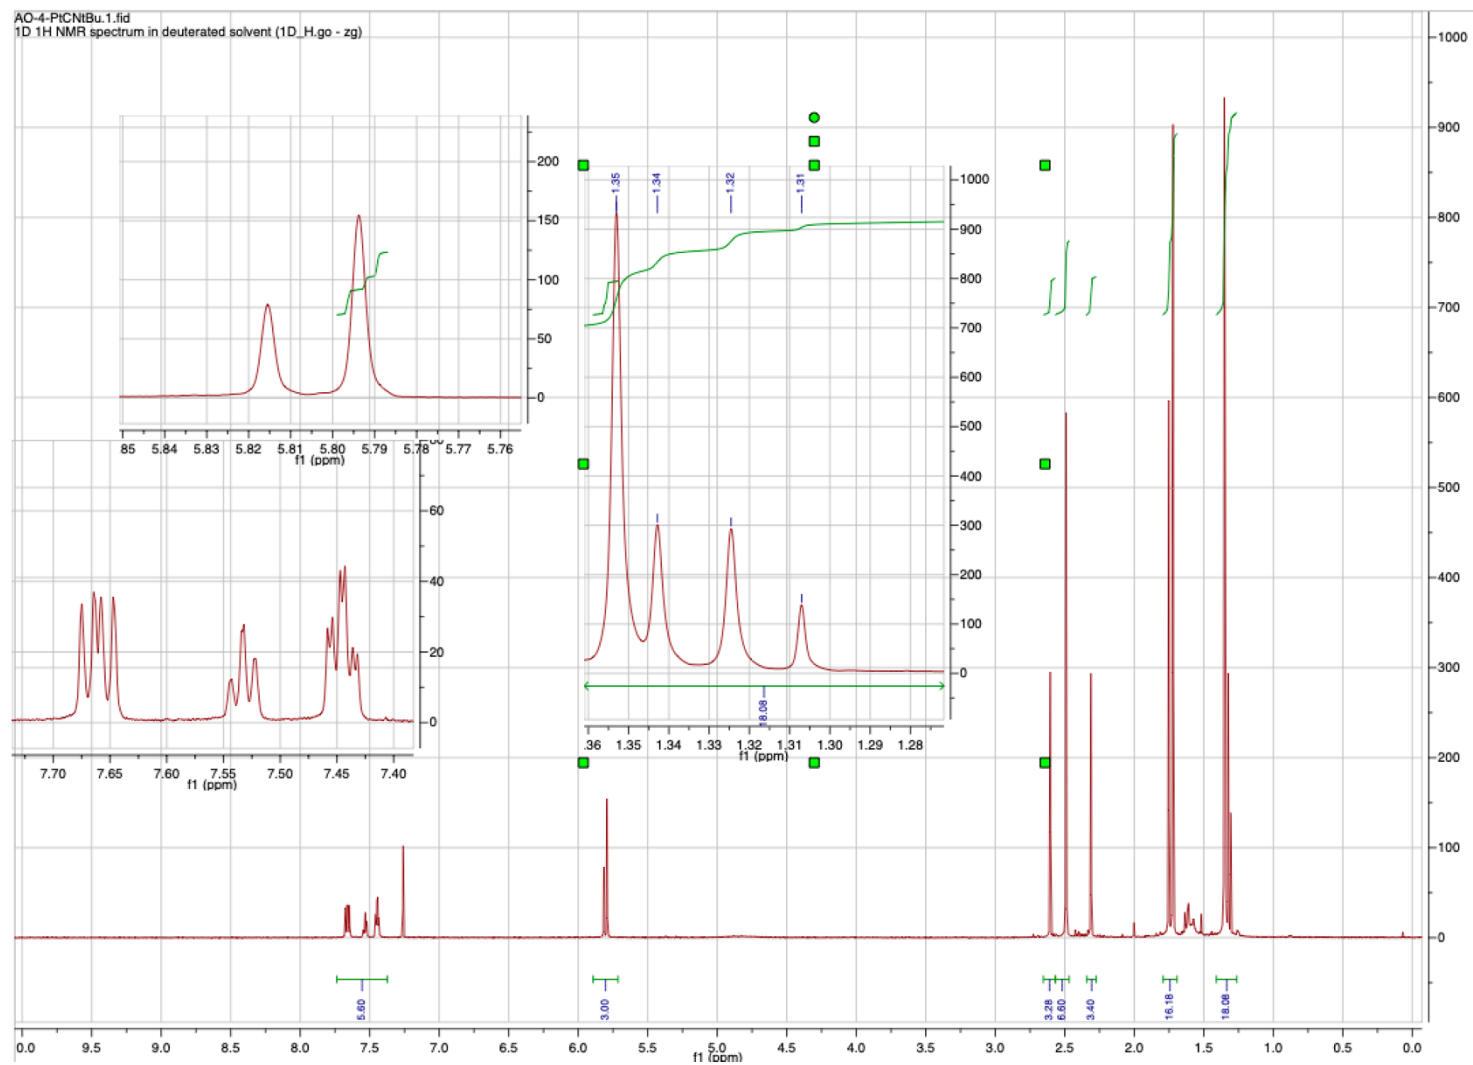

**Figure S21.**  $^{13}\text{C}\{^1\text{H}\}$  NMR Spectrum of  $[\mathbf{7}]\text{PF}_6$  (176.1 MHz, 25 °C)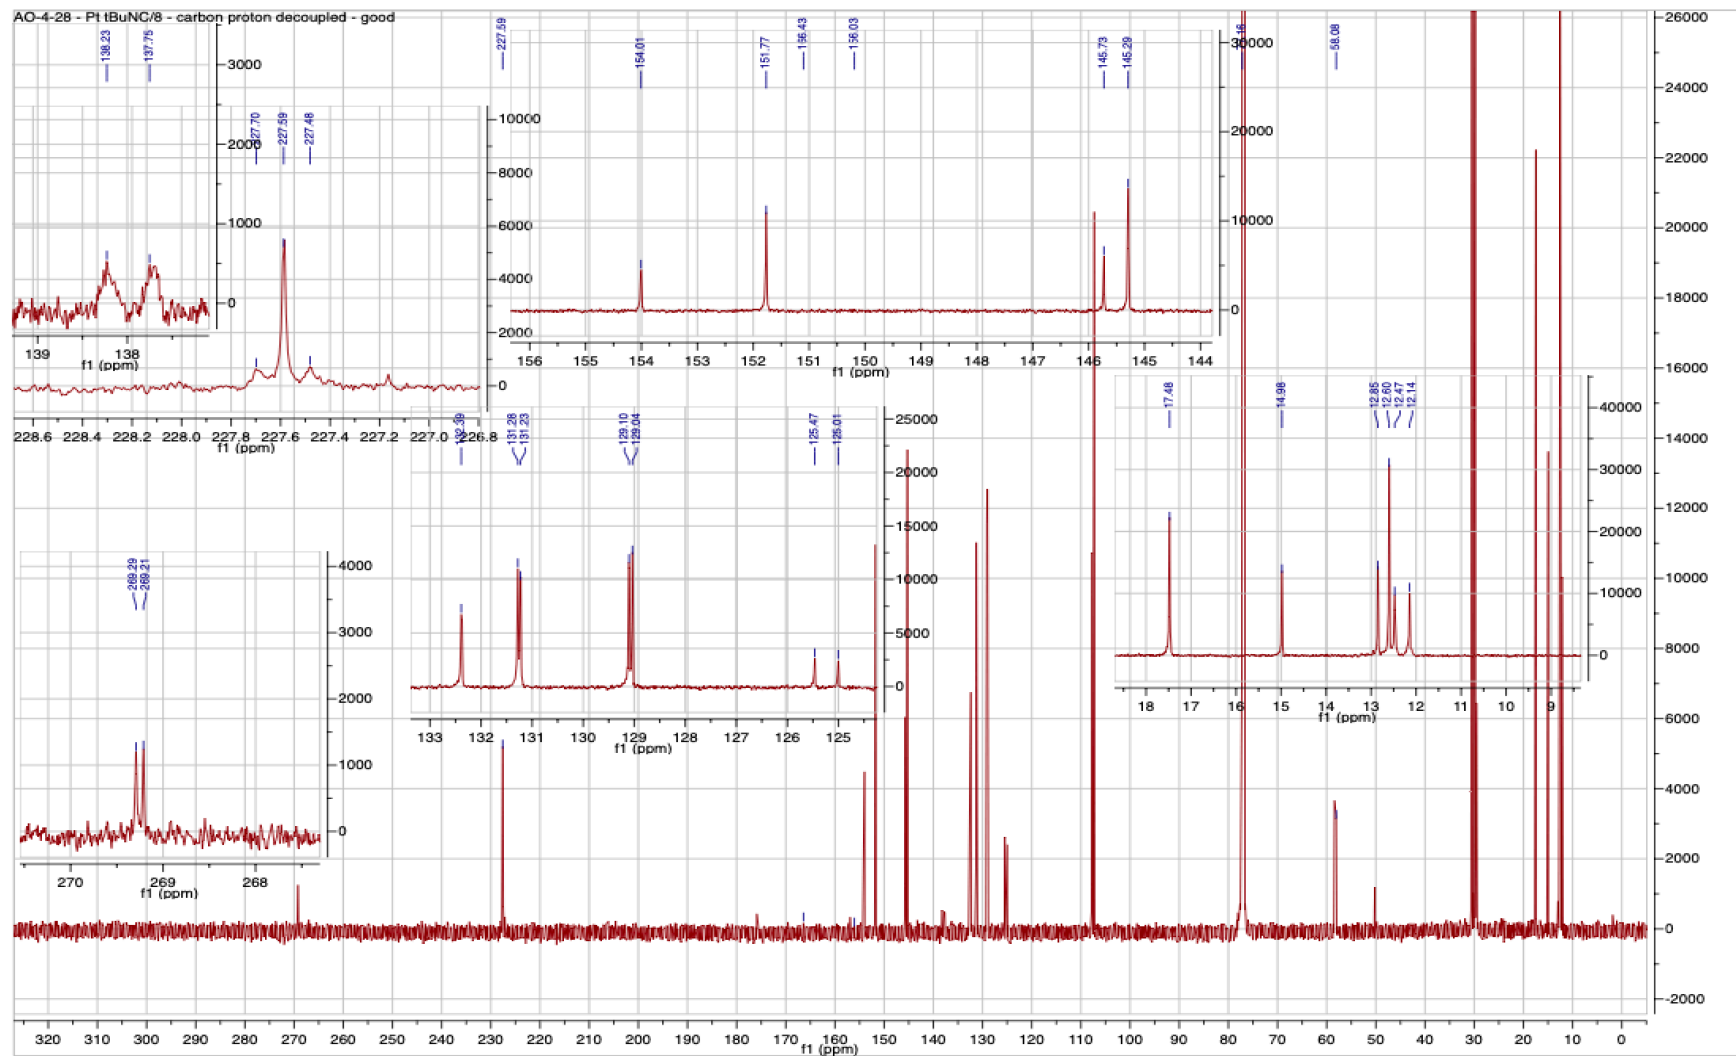

**Figure S22.**  $^{31}\text{P}\{^1\text{H}\}$  NMR Spectrum of  $[\text{7}]\text{PF}_6$  (283 MHz, 25 °C)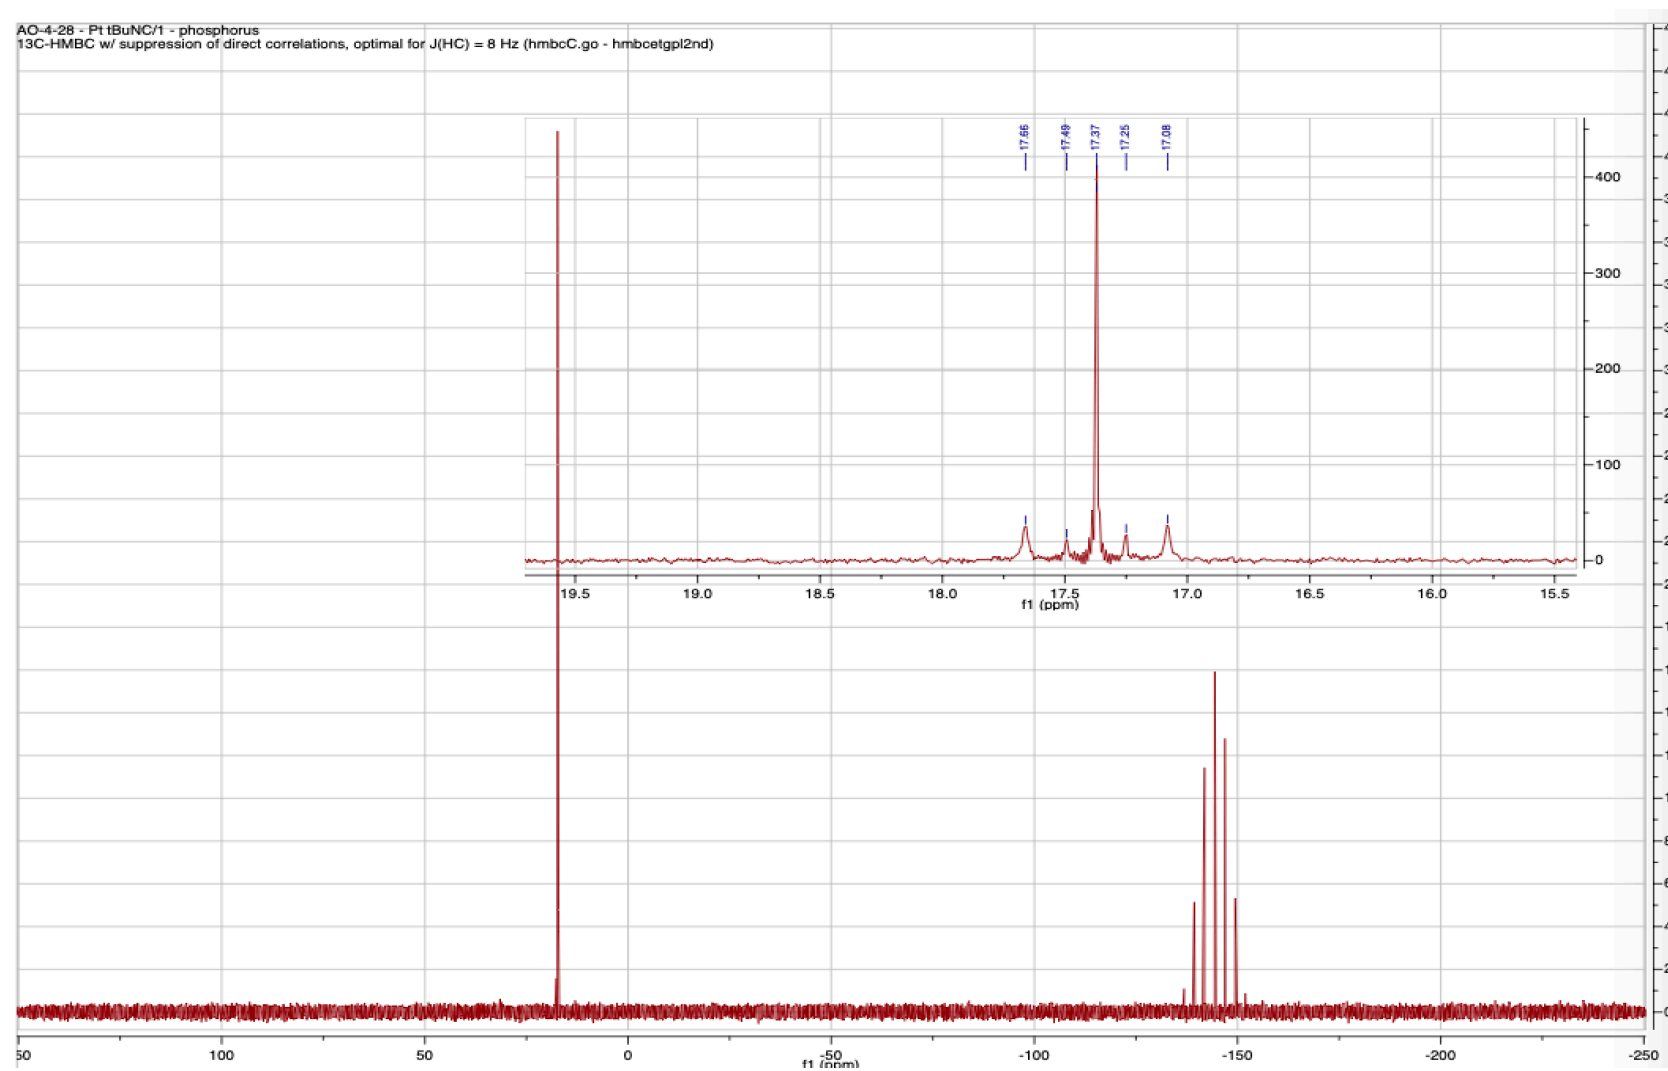



**Figure S23.**  $^{195}\text{Pt}\{^1\text{H}\}$  NMR Spectrum of  $[\text{7}]\text{PF}_6$  (150 MHz, 25 °C)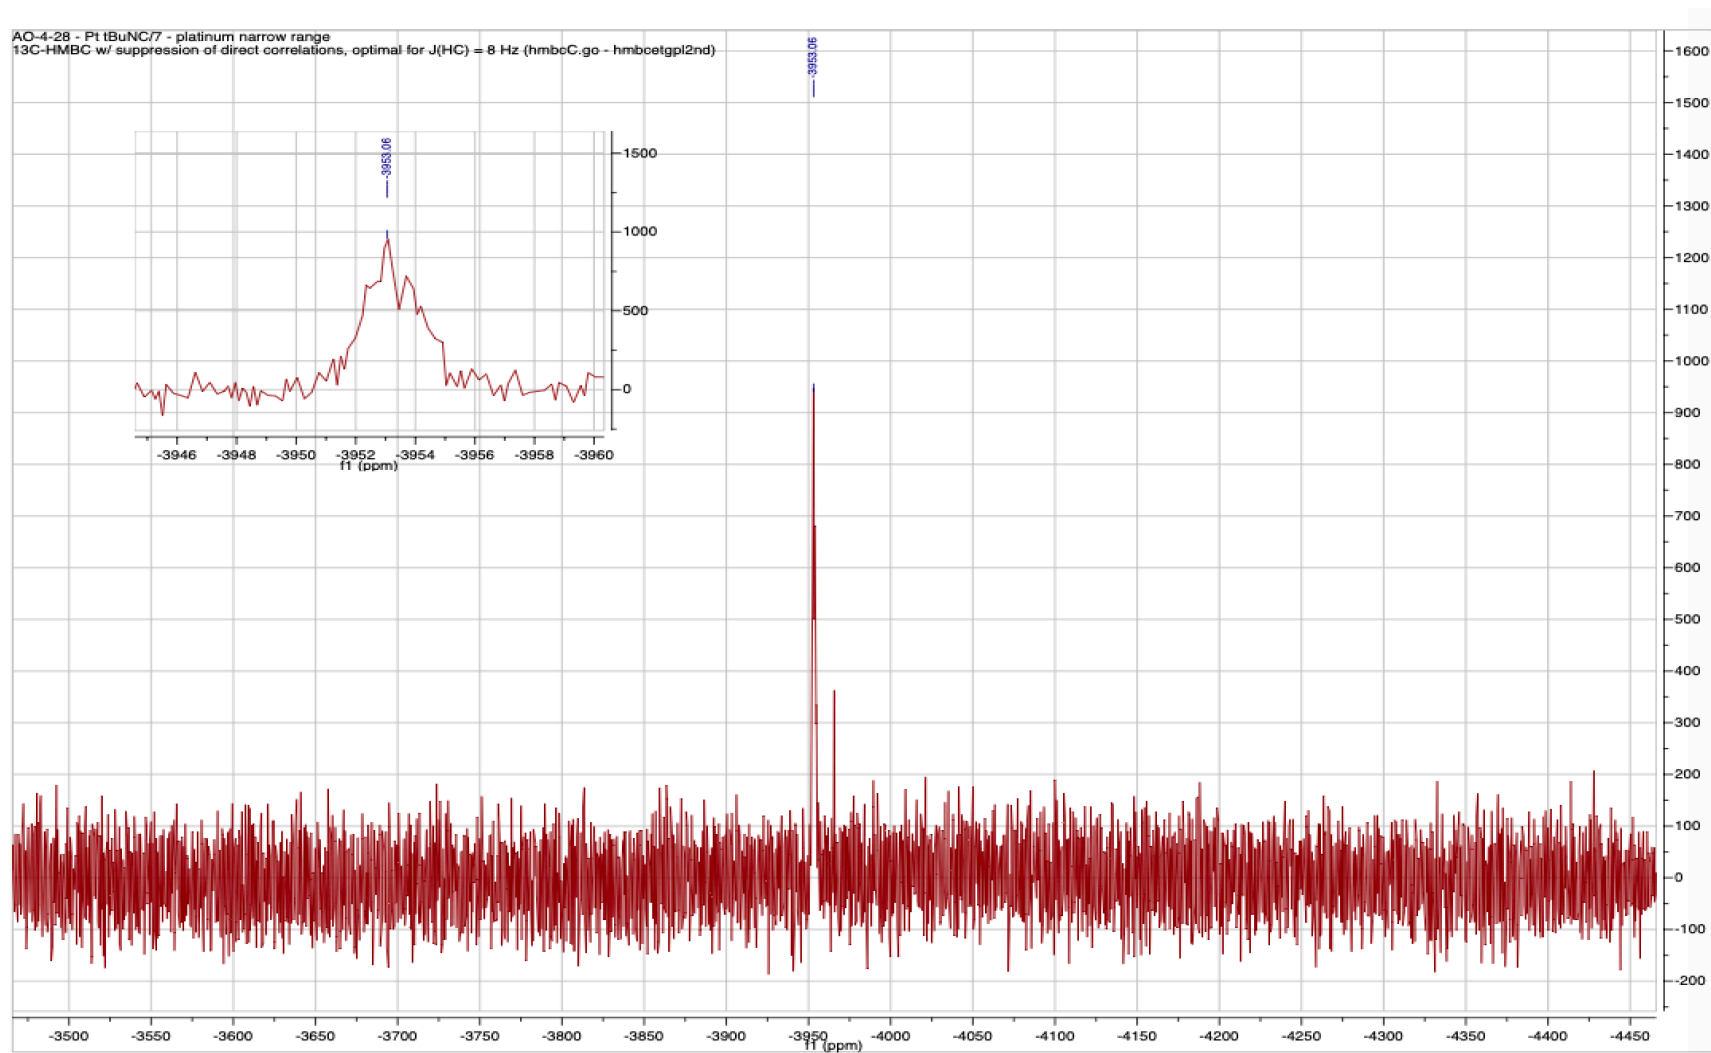

**Figure S24.** ESI Mass Spectra for [7]PF<sub>6</sub>

62498 #16-32 RT: 0.30-0.59 AV: 17 NL: 8.59E7  
T: FTMS + p ESI Full ms [150.0000-2250.0000]

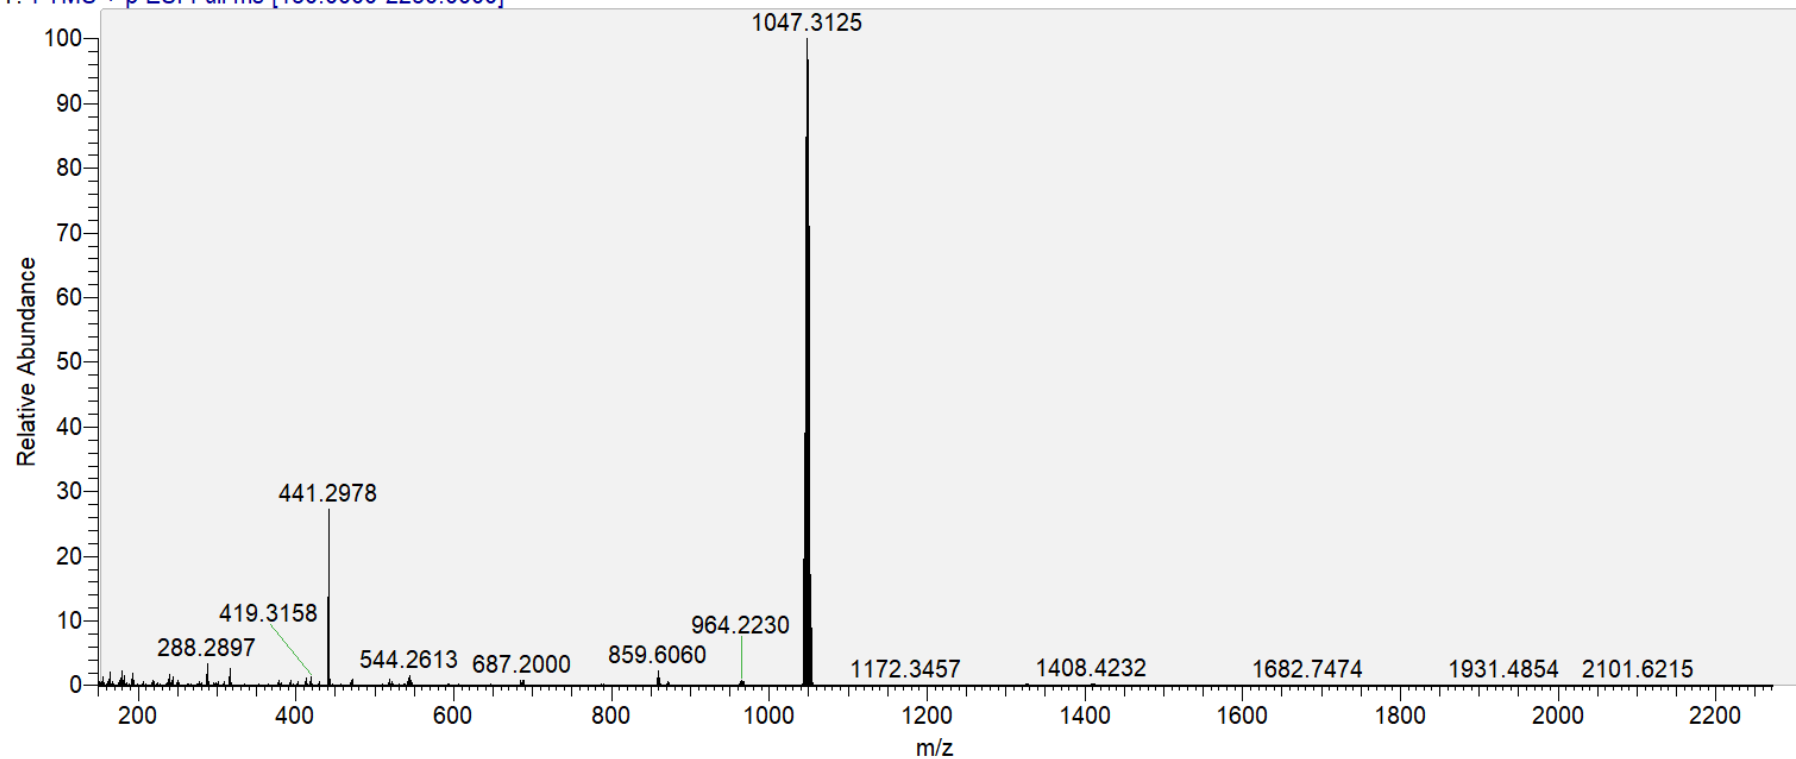

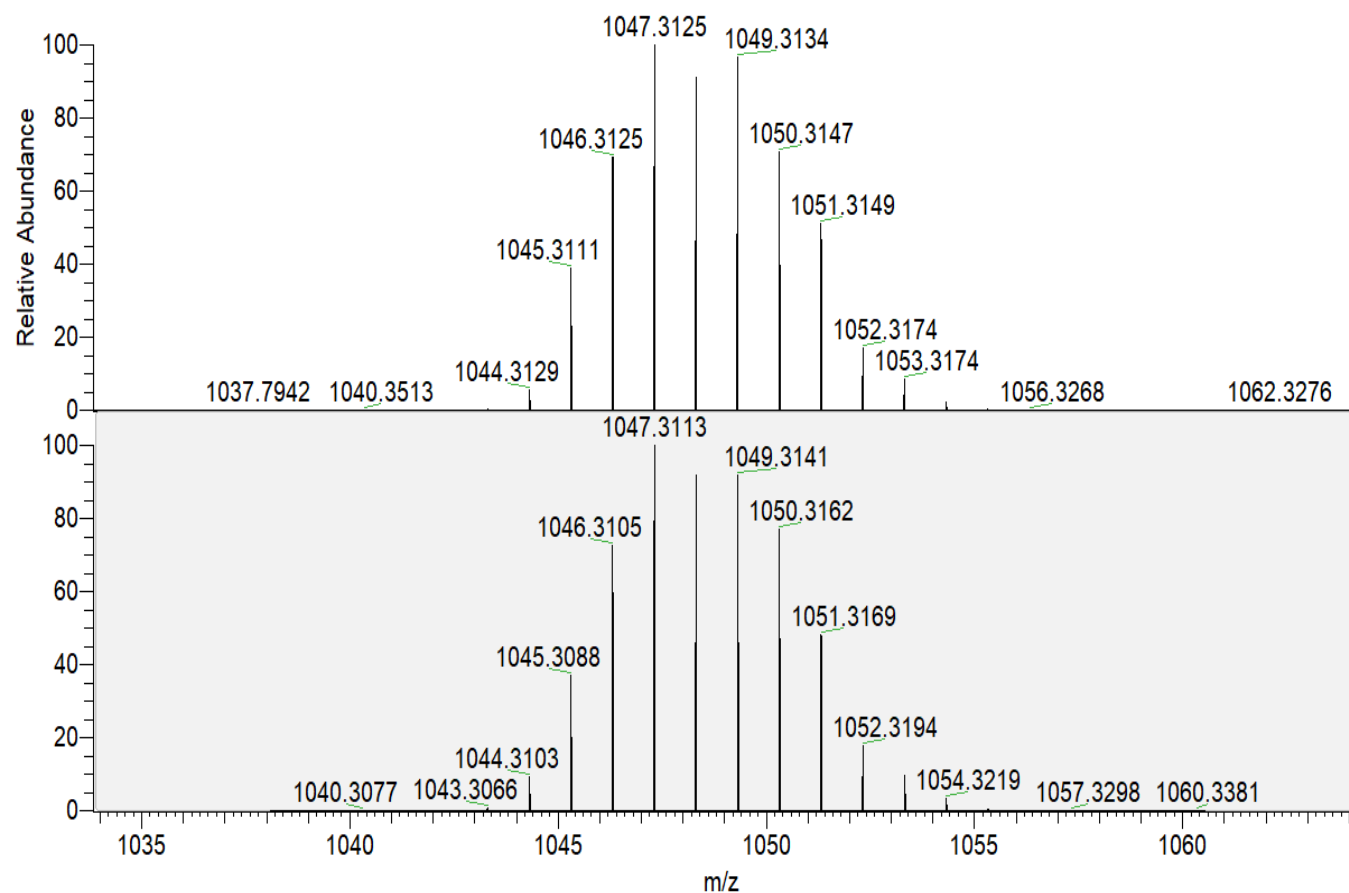

NL:  
8.59E7  
62498#16-32 RT: 0.30-0.59  
AV: 17 T: FTMS + p ESI Full  
ms [150.0000-2250.0000]

NL:  
3.03E3  
C<sub>36</sub> H<sub>51</sub> BN<sub>8</sub> O<sub>2</sub> PPtW:  
C<sub>36</sub> H<sub>51</sub> B<sub>1</sub> N<sub>8</sub> O<sub>2</sub> P<sub>1</sub> Pt<sub>1</sub> W<sub>1</sub>  
p (gss, s /p:40) Chrg 1  
R: 200000 Res .Pwr . @FWHM

**Figure S25.**  $^1\text{H}$  NMR Spectrum of  $[\mathbf{8}]\text{PF}_6$ 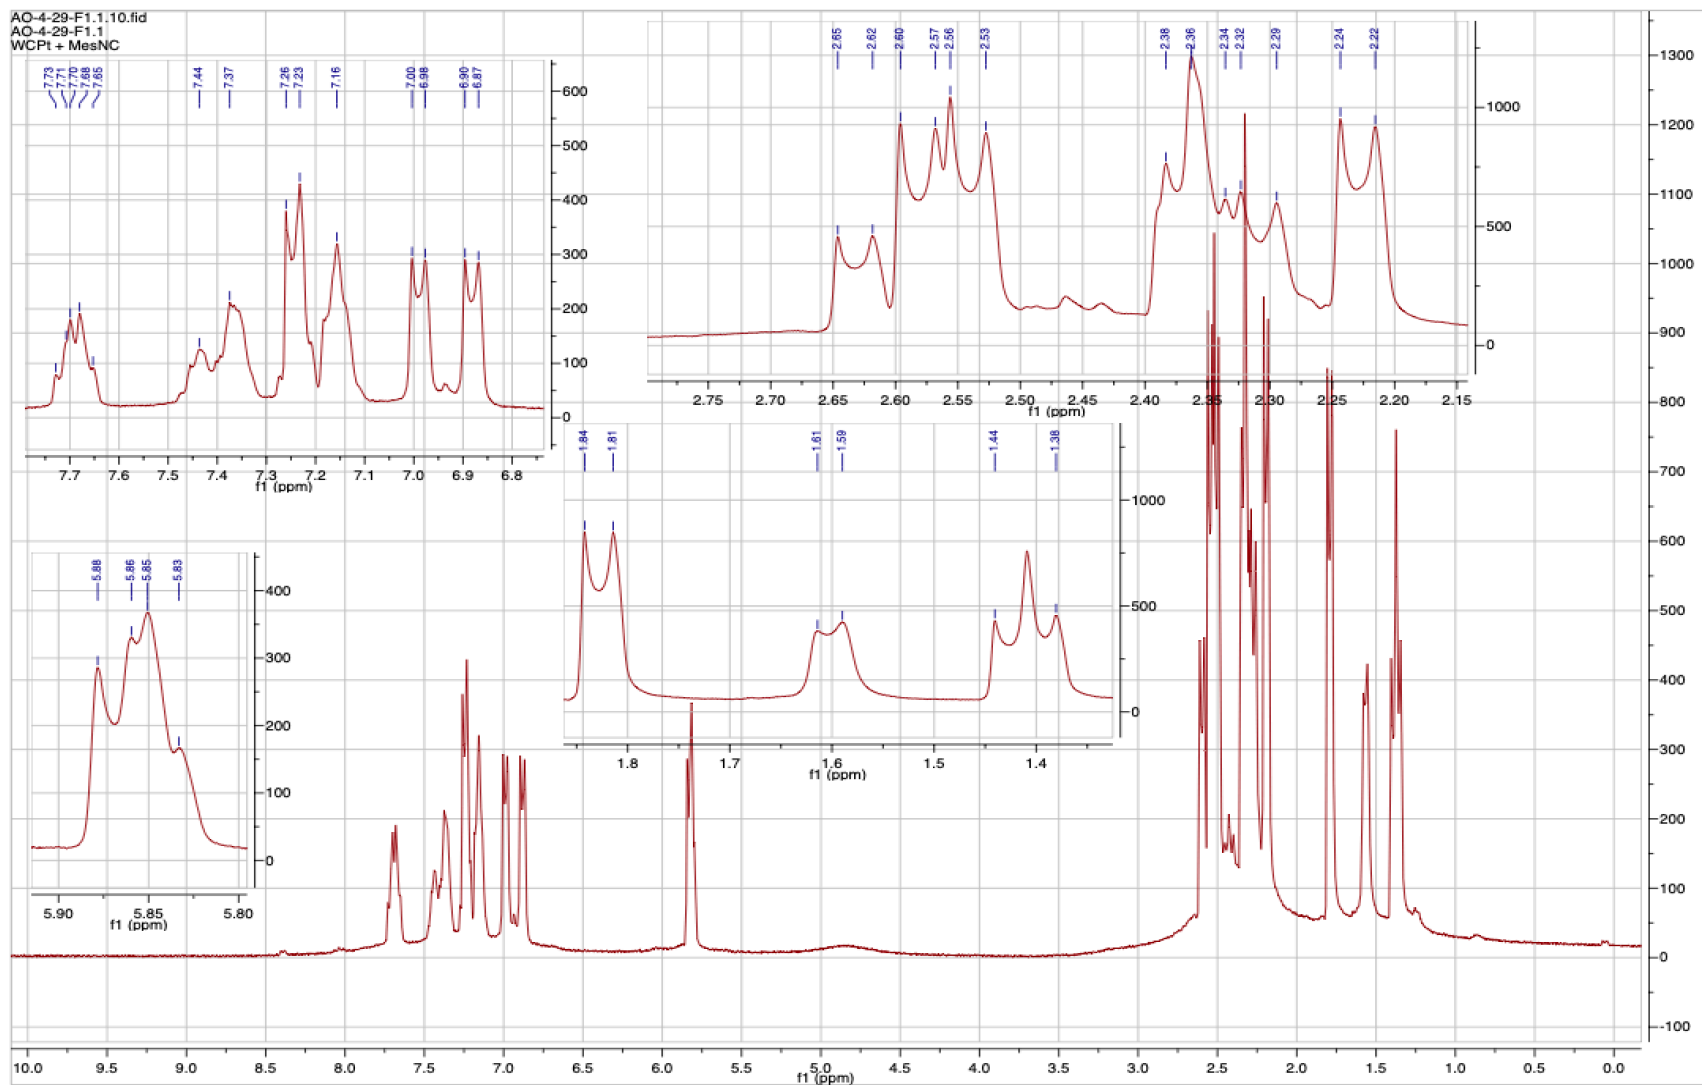

**Figure S26.**  $^{13}\text{C}\{^1\text{H}\}$  NMR Spectrum of  $[\mathbf{8}]\text{PF}_6$ 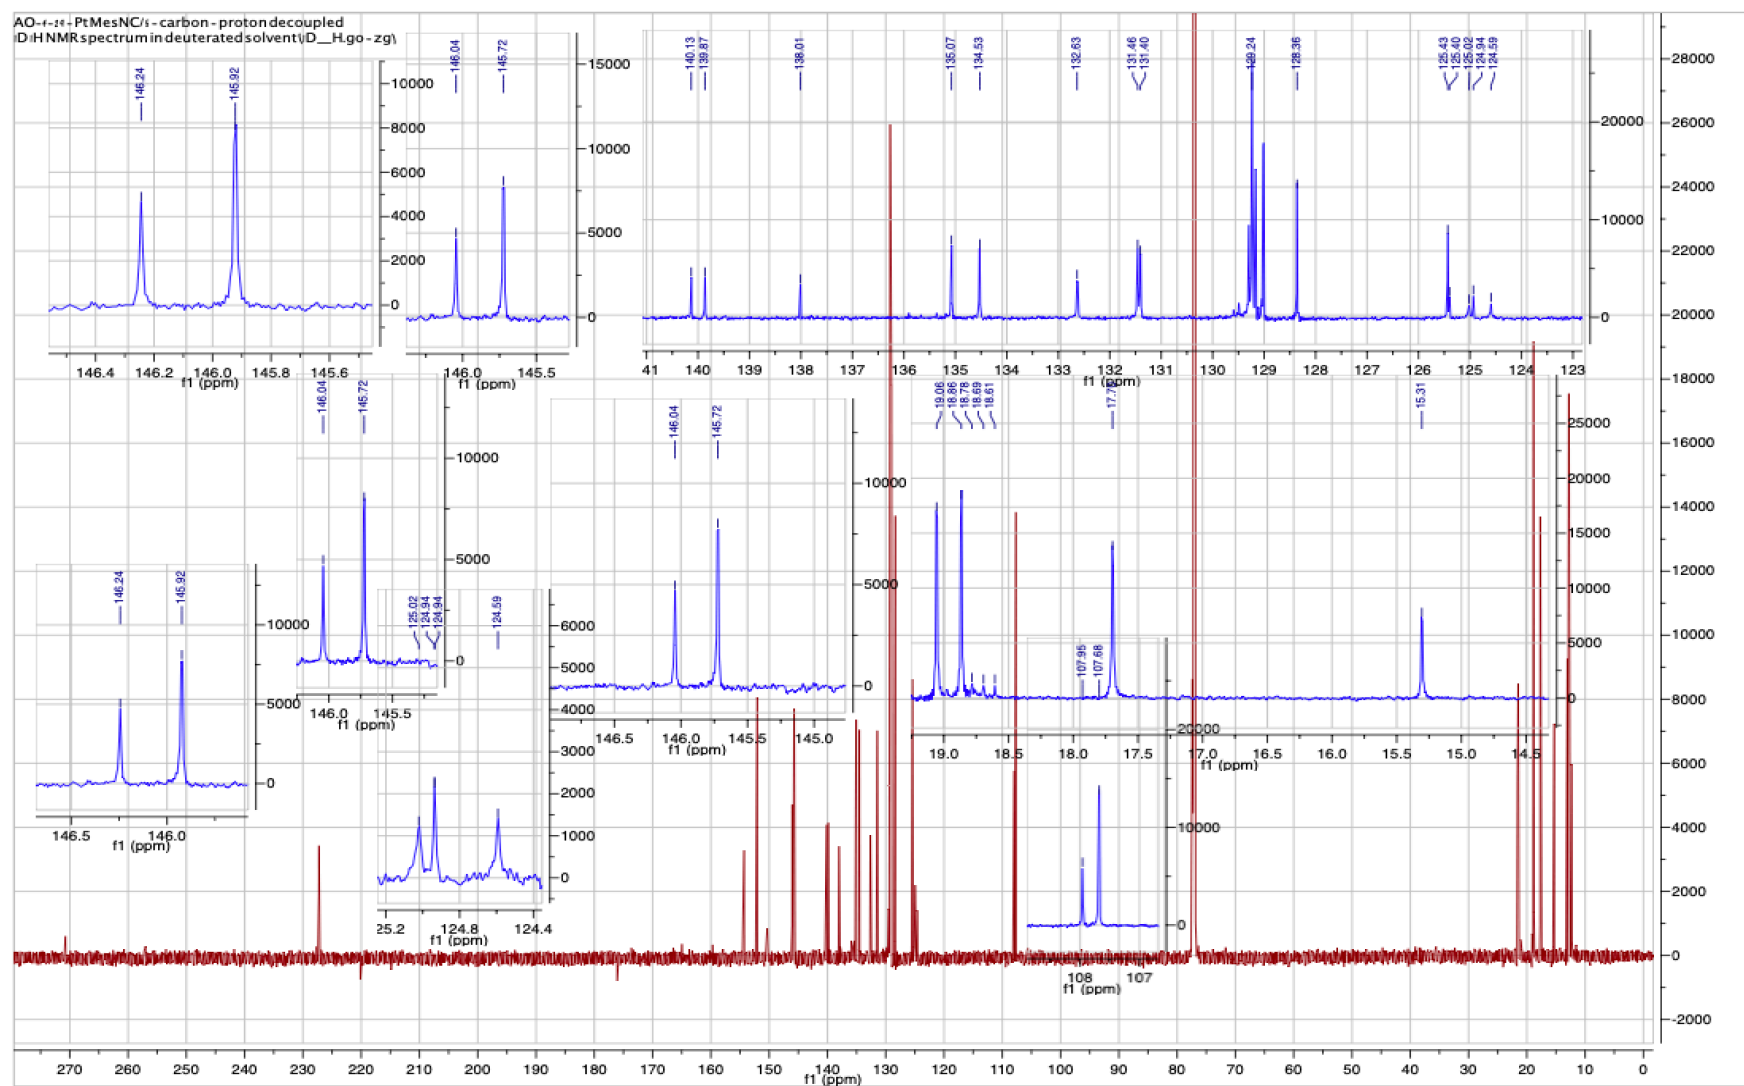

**Figure S27.**  $^{31}\text{P}\{^1\text{H}\}$  NMR Spectrum of **[8]**PF<sub>6</sub>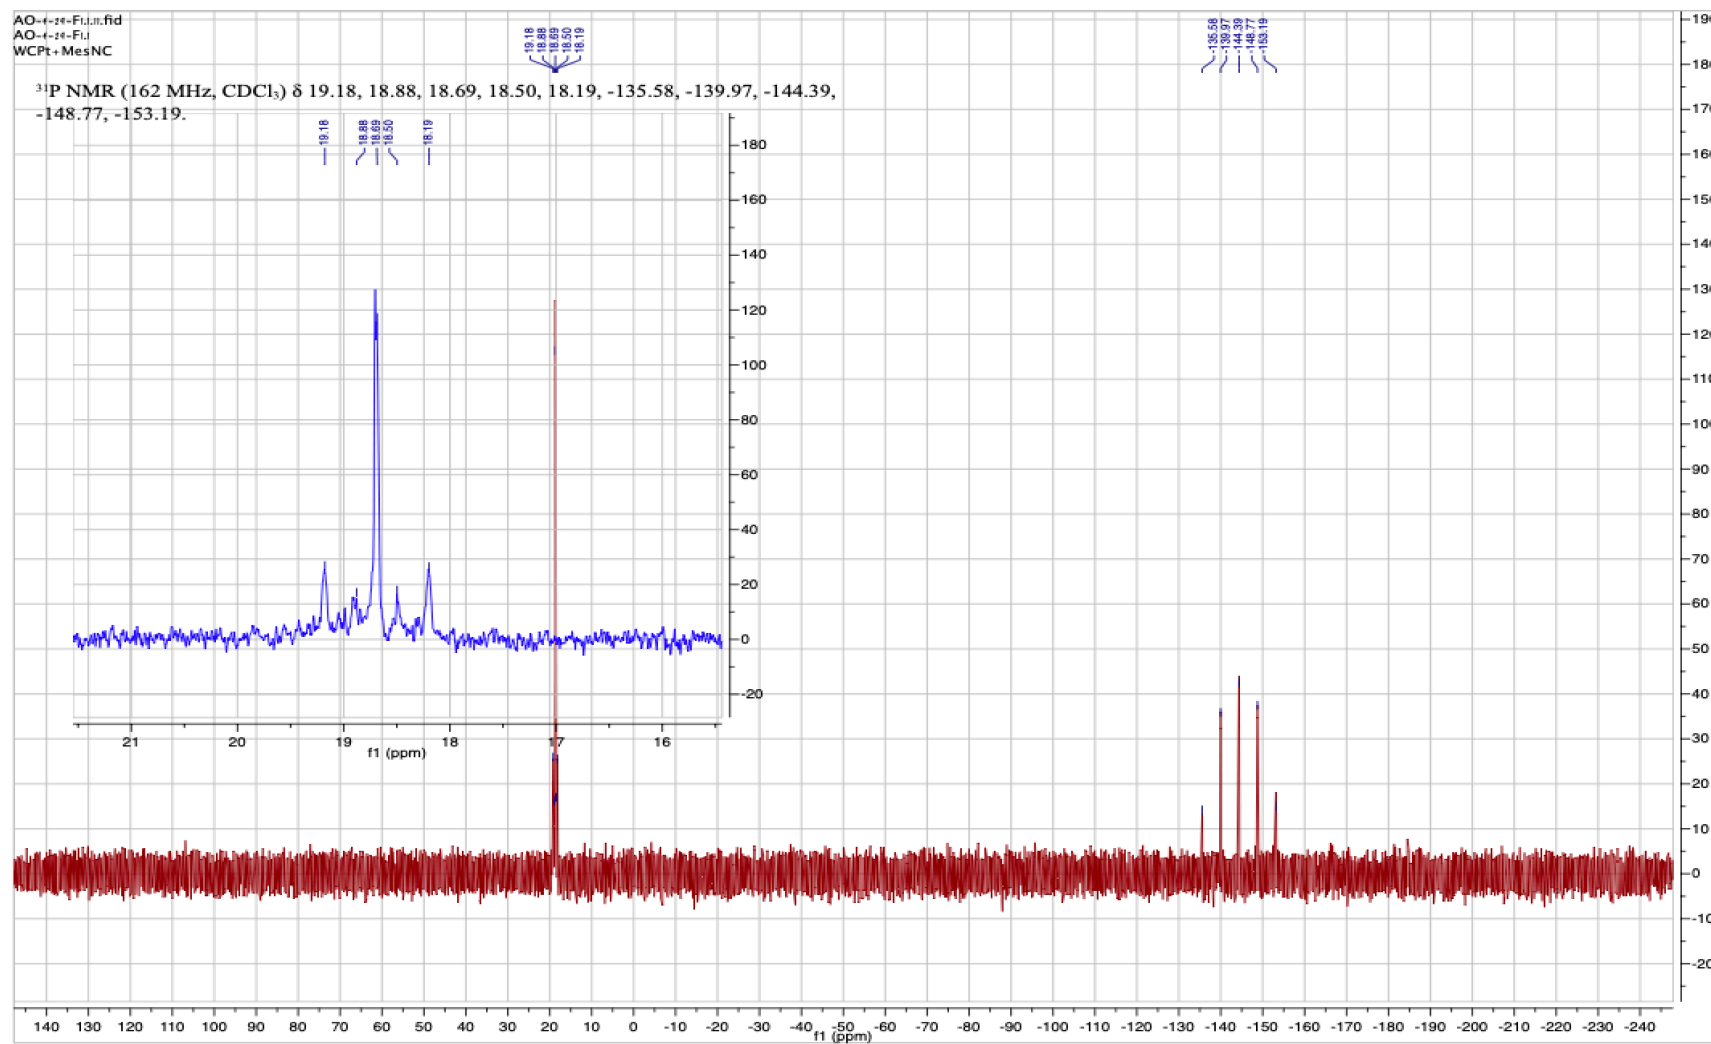

**Figure S28.**  $^{195}\text{Pt}\{^1\text{H}\}$  NMR Spectrum of **[8]**PF<sub>6</sub>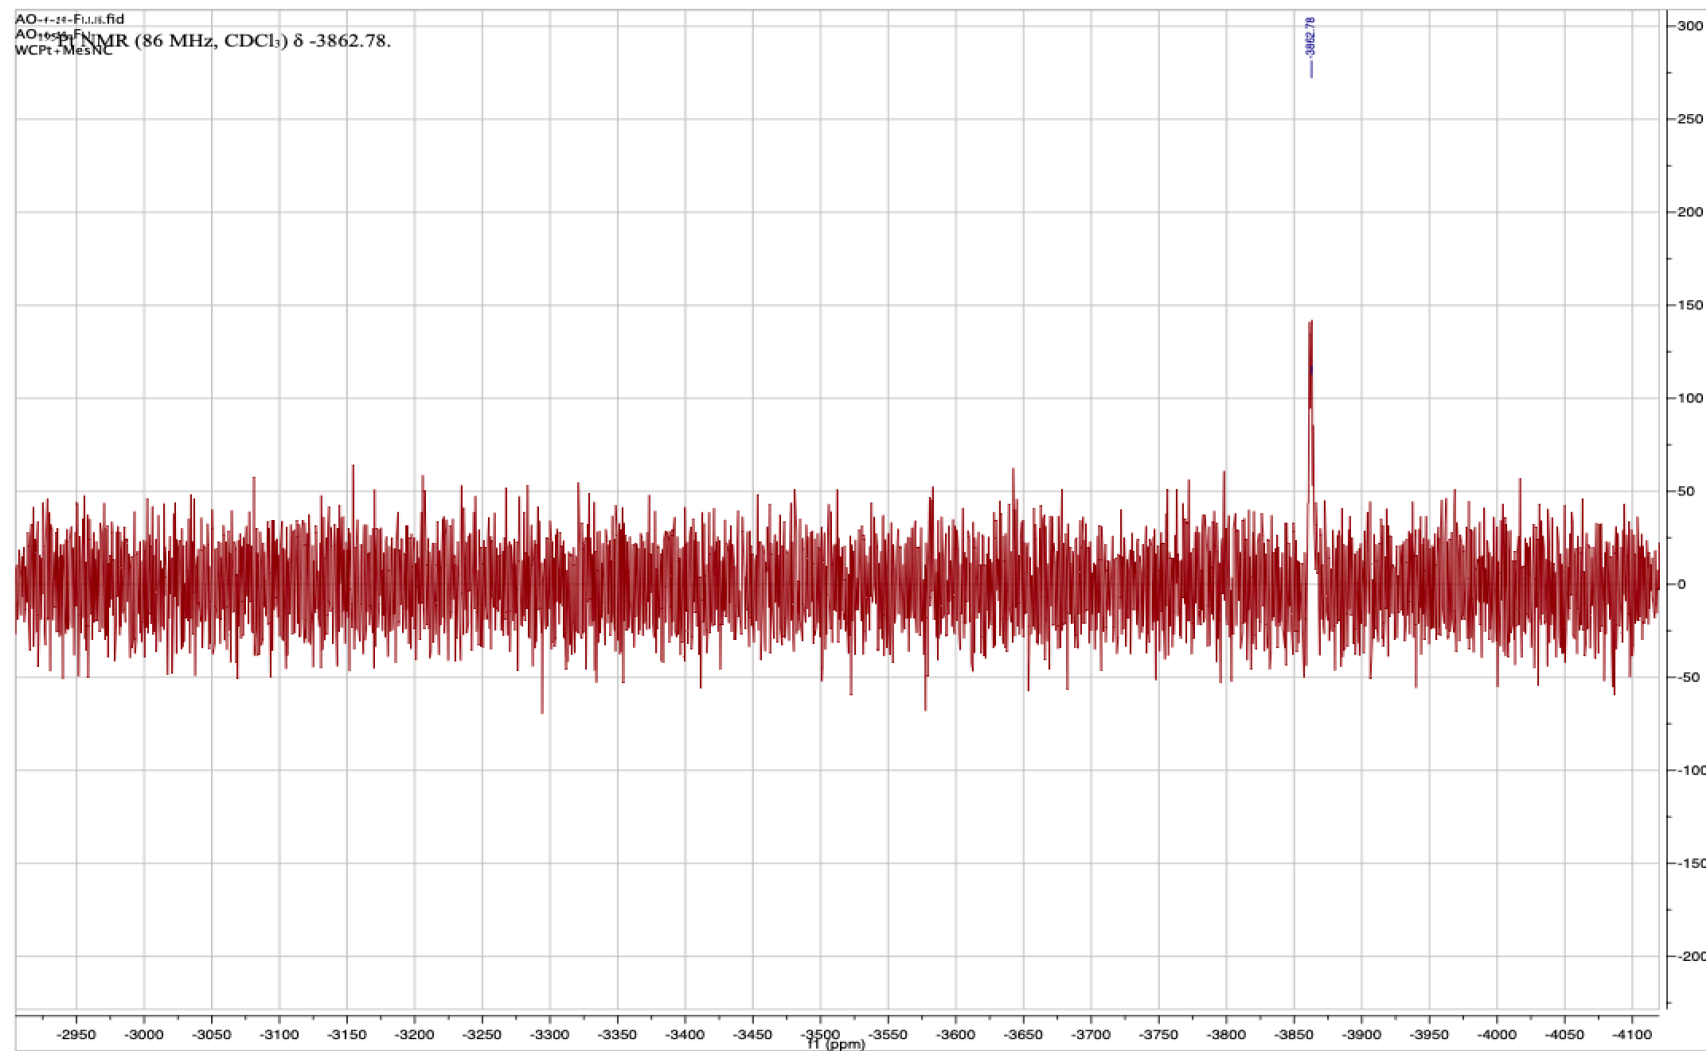

**Figure S29.** ESI Mass Spectra for [8]PF<sub>6</sub>

C:\Xcalibur\data\BG\_62323

01/17/19 15:37:13

Background subtracted file

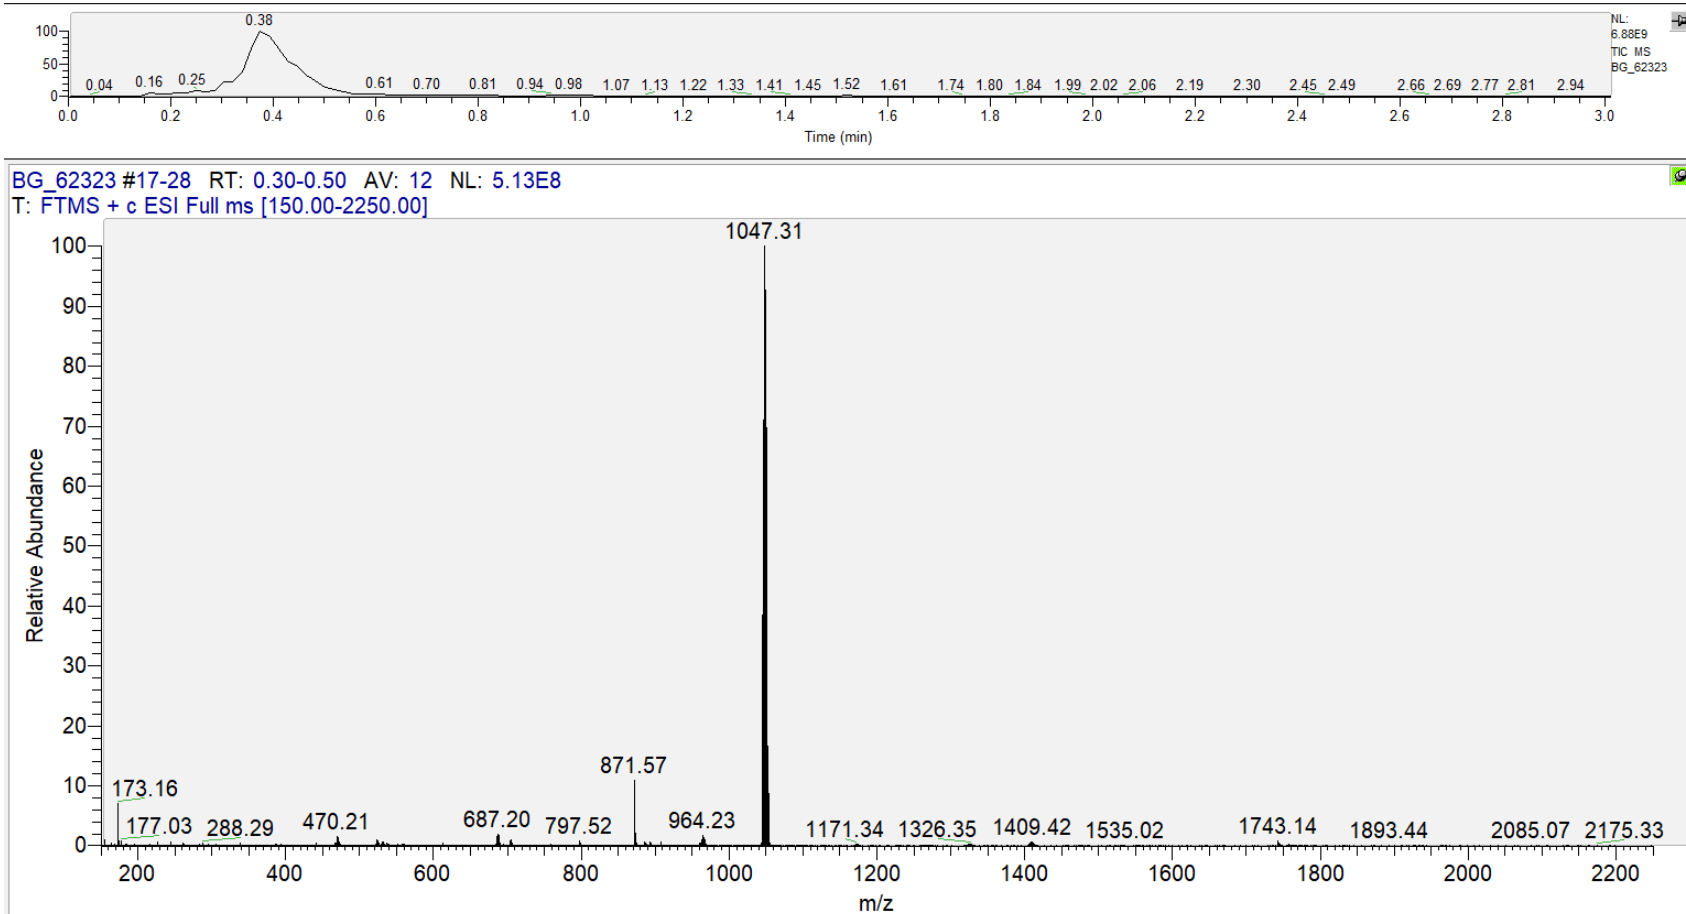



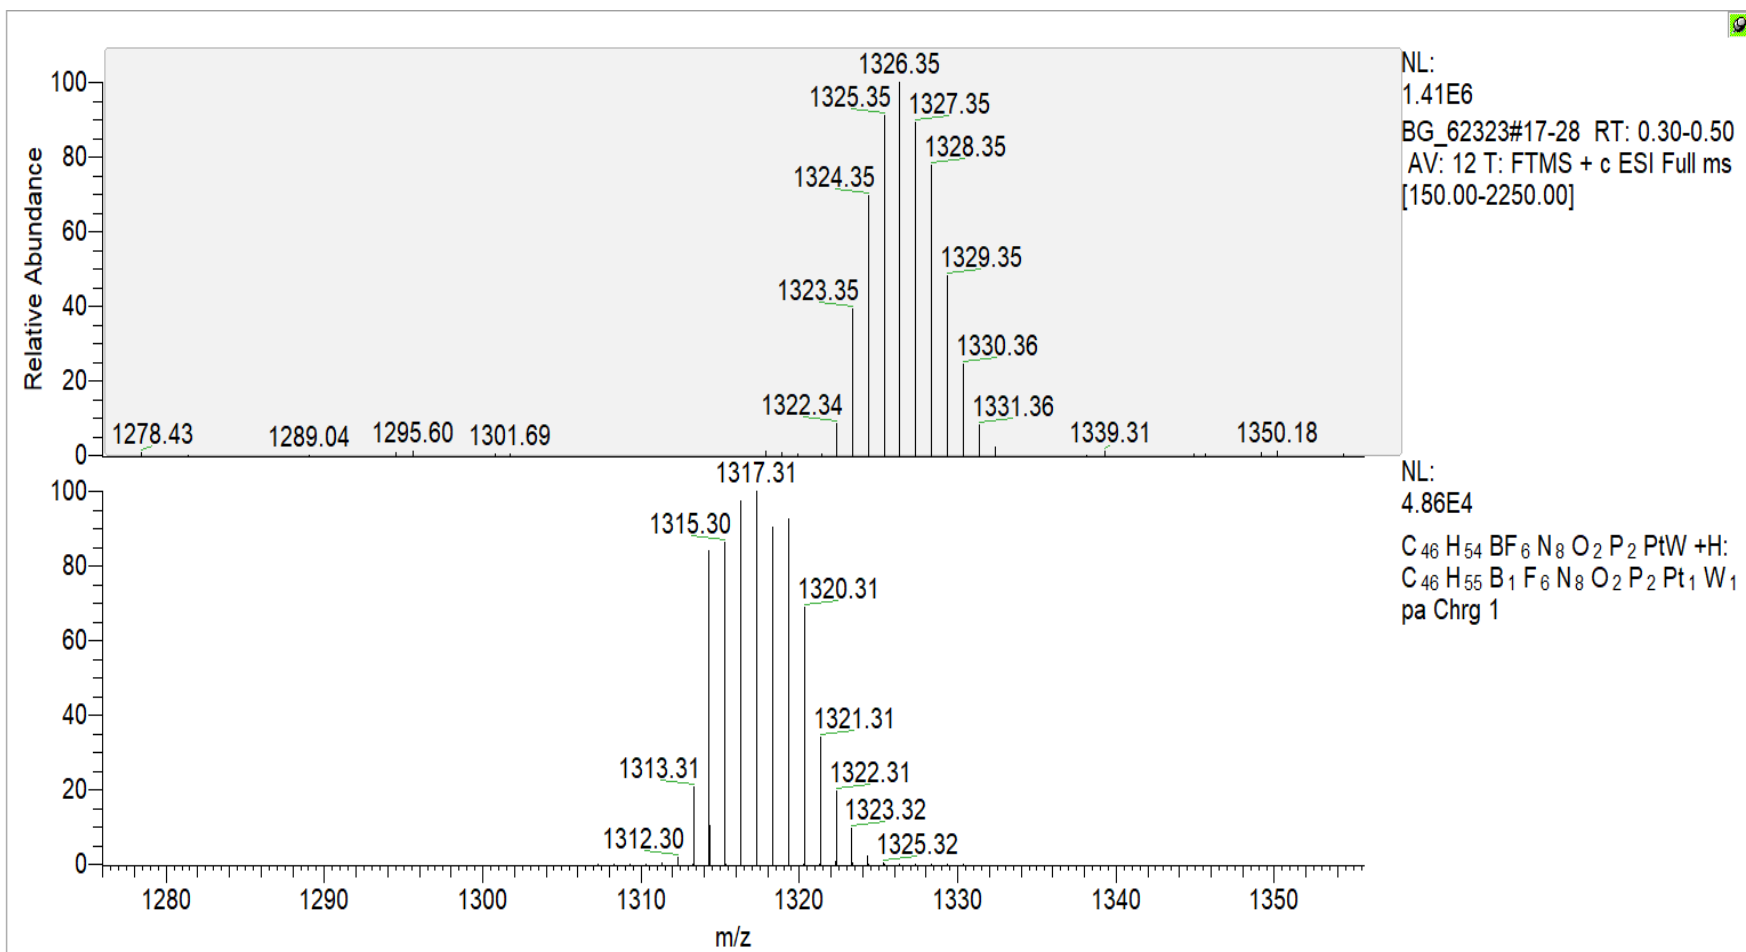

## SUPPORTING INFORMATION

**Geometry Optimisation for  
[W(≡CCMe<sub>3</sub>)(CO)<sub>2</sub>(Tp)] (WC)**

Method: DFT/ωB97X-D/6-31G\*/LANL2DZ, gas phase.

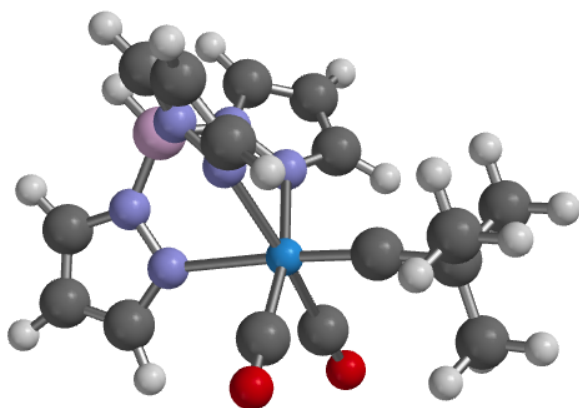

## Cartesian Coordinates

| Atom | x         | y         | z         |
|------|-----------|-----------|-----------|
| W    | 0.503680  | 0.060885  | 0.651349  |
| C    | 1.683413  | 2.763932  | -0.779549 |
| N    | -1.701542 | 0.179812  | 0.267616  |
| N    | -0.710906 | -2.337773 | -1.041961 |
| N    | 0.318989  | -1.466413 | -0.978226 |
| N    | -0.237354 | -1.779794 | 1.888760  |
| N    | -2.456960 | -0.913922 | 0.029358  |
| O    | 0.397208  | 1.922414  | 3.192750  |
| N    | -1.200109 | -2.591889 | 1.402919  |
| C    | 1.118600  | 1.523097  | -0.206458 |
| O    | 3.530869  | -0.611033 | 1.225481  |
| C    | 2.414656  | -0.375159 | 1.031719  |
| C    | 1.108857  | -1.718879 | -2.022951 |
| C    | 0.584744  | -2.764930 | -2.786418 |
| H    | 0.990679  | -3.195899 | -3.688234 |
| C    | 0.435842  | 1.221524  | 2.272261  |
| C    | -0.643371 | -3.396142 | 3.389522  |
| H    | -0.597454 | -4.003302 | 4.280057  |
| C    | -2.512689 | 1.236223  | 0.201621  |
| C    | -0.574155 | -3.125732 | -2.122159 |
| C    | -3.732519 | -0.548676 | -0.185120 |
| C    | -3.817992 | 0.828675  | -0.085732 |
| H    | -4.694765 | 1.446319  | -0.202091 |
| C    | 0.106283  | -2.256322 | 3.085201  |
| C    | 2.085596  | 2.495570  | -2.241376 |
| H    | 2.850357  | 1.713773  | -2.295812 |
| H    | 2.494209  | 3.406615  | -2.694419 |
| H    | 1.221790  | 2.174016  | -2.832208 |
| C    | -1.461818 | -3.569508 | 2.287127  |
| C    | 2.915719  | 3.178944  | 0.044802  |
| H    | 2.643934  | 3.350840  | 1.091084  |

|   |           |           |           |
|---|-----------|-----------|-----------|
| H | 3.345876  | 4.103380  | -0.358602 |
| H | 3.684073  | 2.400036  | 0.015611  |
| B | -1.827082 | -2.321515 | 0.021008  |
| H | -2.659585 | -3.153947 | -0.231762 |
| H | -2.110112 | 2.225637  | 0.362554  |
| H | -4.484805 | -1.295841 | -0.390033 |
| H | -1.308383 | -3.888537 | -2.334951 |
| H | 2.005934  | -1.133868 | -2.163474 |
| H | 0.870734  | -1.754738 | 3.661966  |
| H | -2.210117 | -4.316855 | 2.067865  |
| C | 0.607564  | 3.864591  | -0.717899 |
| H | 0.997361  | 4.799964  | -1.136731 |
| H | 0.303616  | 4.050354  | 0.317586  |
| H | -0.278861 | 3.574071  | -1.292049 |

## Geometry Optimisation for [W(≡CSiMe<sub>3</sub>)(CO)<sub>2</sub>(Tp)] (WSi)

Method: DFT/ωB97X-D/6-31G\*/LANL2Dζ, gas phase.

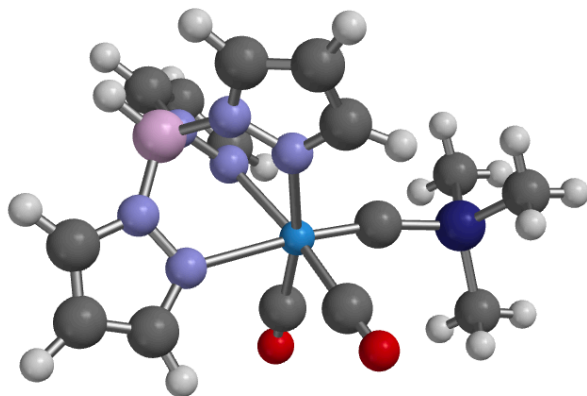

### Cartesian Coordinates

| Atom | x         | y         | z         |
|------|-----------|-----------|-----------|
| W    | 0.423035  | -0.053981 | 0.612696  |
| Si   | 1.834158  | 3.000290  | -0.810655 |
| N    | -1.780250 | 0.054192  | 0.265583  |
| N    | -0.808270 | -2.468441 | -1.030705 |
| N    | 0.218397  | -1.591620 | -0.990432 |
| N    | -0.303782 | -1.909394 | 1.899904  |
| N    | -2.540146 | -1.042775 | 0.055562  |
| O    | 0.323077  | 1.788159  | 3.175750  |
| N    | -1.271344 | -2.721617 | 1.422754  |
| C    | 1.054772  | 1.411684  | -0.216943 |
| O    | 3.445549  | -0.749501 | 1.212408  |
| C    | 2.335806  | -0.505443 | 1.002573  |
| C    | 0.989573  | -1.840968 | -2.049743 |
| C    | 0.459545  | -2.895947 | -2.795732 |
| H    | 0.850592  | -3.328021 | -3.703471 |
| C    | 0.359686  | 1.098945  | 2.248487  |
| C    | -0.692441 | -3.530935 | 3.400529  |
| H    | -0.635632 | -4.141306 | 4.288261  |
| C    | -2.591246 | 1.111290  | 0.201473  |
| C    | -0.683078 | -3.263431 | -2.106580 |
| C    | -3.819079 | -0.678094 | -0.138829 |
| C    | -3.901514 | 0.700781  | -0.055581 |
| H    | -4.779971 | 1.317573  | -0.163321 |
| C    | 0.052078  | -2.388397 | 3.091629  |
| C    | 2.415693  | 2.773838  | -2.588861 |
| H    | 3.170048  | 1.982352  | -2.656279 |
| H    | 2.859827  | 3.696496  | -2.979864 |
| H    | 1.580079  | 2.497936  | -3.241018 |
| C    | -1.522085 | -3.702950 | 2.306494  |
| C    | 3.287490  | 3.384241  | 0.324554  |
| H    | 2.946716  | 3.508119  | 1.358265  |
| H    | 3.800137  | 4.304958  | 0.023163  |
| H    | 4.016402  | 2.566757  | 0.312819  |
| B    | -1.911702 | -2.450958 | 0.047365  |
| H    | -2.748755 | -3.281074 | -0.195435 |
| H    | -2.185027 | 2.102673  | 0.339574  |
| H    | -4.575865 | -1.426948 | -0.319909 |
| H    | -1.415380 | -4.032941 | -2.301109 |

|   |           |           |           |
|---|-----------|-----------|-----------|
| H | 1.875406  | -1.245624 | -2.215004 |
| H | 0.821694  | -1.888110 | 3.662686  |
| H | -2.271164 | -4.451274 | 2.092925  |
| C | 0.533539  | 4.361313  | -0.713050 |
| H | 0.934045  | 5.324044  | -1.051246 |
| H | 0.181851  | 4.485836  | 0.317106  |
| H | -0.332463 | 4.118276  | -1.338788 |

### Geometry Optimisation for [W(=CNMe<sub>3</sub>)(CO)<sub>2</sub>(Tp)]<sup>+</sup> (WN)

Method: DFT/ $\omega$ B97X-D/6-31G\*/LANL2D $\zeta$ , gas phase.

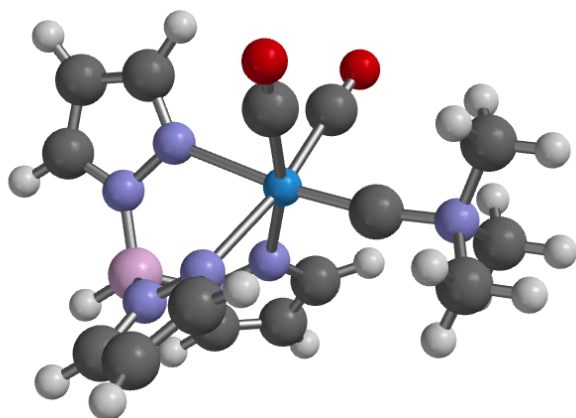

|   |           |           |           |
|---|-----------|-----------|-----------|
| H | 0.930483  | -1.599969 | 3.594679  |
| H | -2.140032 | -4.238235 | 2.116197  |
| C | 0.655603  | 3.850621  | -0.686053 |
| H | 1.092613  | 4.770917  | -1.078744 |
| H | 0.376506  | 3.973408  | 0.360258  |
| H | -0.213865 | 3.555394  | -1.273307 |

#### Cartesian Coordinates

| Atom | x         | y         | z         |
|------|-----------|-----------|-----------|
| W    | 0.462750  | 0.067389  | 0.559296  |
| N    | 1.676748  | 2.751174  | -0.773759 |
| N    | -1.715182 | 0.191845  | 0.212753  |
| N    | -0.722024 | -2.336245 | -1.074586 |
| N    | 0.307488  | -1.461471 | -1.024527 |
| N    | -0.204442 | -1.684252 | 1.828945  |
| N    | -2.467098 | -0.907602 | -0.015112 |
| O    | 0.287212  | 1.846560  | 3.176311  |
| N    | -1.167791 | -2.523836 | 1.379331  |
| C    | 1.088612  | 1.528871  | -0.281795 |
| O    | 3.461509  | -0.729755 | 1.218555  |
| C    | 2.367928  | -0.457903 | 0.994401  |
| C    | 1.118075  | -1.753877 | -2.047521 |
| C    | 0.608714  | -2.826217 | -2.776899 |
| H    | 1.031184  | -3.293414 | -3.652535 |
| C    | 0.346782  | 1.178607  | 2.242438  |
| C    | -0.566413 | -3.256562 | 3.383854  |
| H    | -0.500413 | -3.837290 | 4.290363  |
| C    | -2.543301 | 1.241775  | 0.191640  |
| C    | -0.560653 | -3.165991 | -2.116921 |
| C    | -3.750908 | -0.552706 | -0.179234 |
| C    | -3.848498 | 0.823723  | -0.059795 |
| H    | -4.737042 | 1.430518  | -0.135420 |
| C    | 0.163734  | -2.121980 | 3.039394  |
| C    | 2.085381  | 2.546942  | -2.205670 |
| H    | 2.827602  | 1.749860  | -2.237076 |
| H    | 2.504782  | 3.479346  | -2.588783 |
| H    | 1.202802  | 2.255613  | -2.774801 |
| C    | -1.399091 | -3.473653 | 2.297816  |
| C    | 2.878908  | 3.102030  | 0.058646  |
| H    | 2.554348  | 3.232535  | 1.090750  |
| H    | 3.316565  | 4.024093  | -0.328820 |
| H    | 3.591692  | 2.280209  | -0.004350 |
| B    | -1.827187 | -2.310106 | -0.000691 |
| H    | -2.649692 | -3.156724 | -0.212836 |
| H    | -2.156996 | 2.235224  | 0.366701  |
| H    | -4.504523 | -1.303815 | -0.363639 |
| H    | -1.285712 | -3.941974 | -2.312475 |
| H    | 2.022843  | -1.183076 | -2.196983 |

## Geometry Optimisation for [W(=CPMe<sub>3</sub>)(CO)<sub>2</sub>(Tp)]<sup>+</sup> (WP)

Method: DFT/ $\omega$ B97X-D/6-31G\*/LANL2D $\zeta$ , gas phase

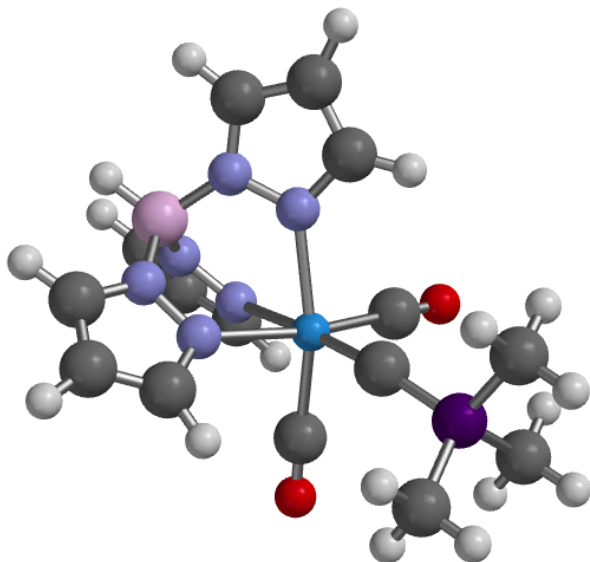

|   |           |           |           |
|---|-----------|-----------|-----------|
| B | -1.905078 | -2.458649 | 0.035588  |
| H | -2.716692 | -3.322054 | -0.148169 |
| H | -2.288762 | 2.094838  | 0.233954  |
| H | -4.601932 | -1.499960 | -0.318408 |
| H | -1.362932 | -4.135236 | -2.245284 |
| H | 1.884452  | -1.301012 | -2.252502 |
| H | 0.876245  | -1.631227 | 3.588738  |
| H | -2.164761 | -4.347498 | 2.192885  |
| C | 0.690622  | 4.338818  | -0.551675 |
| H | 1.197634  | 5.270823  | -0.817876 |
| H | 0.370473  | 4.385323  | 0.492615  |
| H | -0.187948 | 4.209033  | -1.188865 |

### Cartesian Coordinates

| Atom | x         | y         | z         |
|------|-----------|-----------|-----------|
| W    | 0.346467  | -0.025606 | 0.488820  |
| P    | 1.806889  | 2.927879  | -0.772979 |
| N    | -1.826366 | 0.051597  | 0.164170  |
| N    | -0.812984 | -2.491882 | -1.052244 |
| N    | 0.199500  | -1.595481 | -1.040196 |
| N    | -0.274575 | -1.767098 | 1.836930  |
| N    | -2.566066 | -1.066368 | -0.010453 |
| O    | 0.151005  | 1.768200  | 3.100781  |
| N    | -1.228627 | -2.631310 | 1.413320  |
| C    | 1.001079  | 1.444516  | -0.338082 |
| O    | 3.346745  | -0.807079 | 1.179939  |
| C    | 2.256637  | -0.538906 | 0.940641  |
| C    | 0.999011  | -1.892363 | -2.071342 |
| C    | 0.498980  | -2.990326 | -2.767306 |
| H    | 0.914667  | -3.466492 | -3.641326 |
| C    | 0.216761  | 1.101705  | 2.167870  |
| C    | -0.594362 | -3.316309 | 3.424642  |
| H    | -0.509199 | -3.878711 | 4.341116  |
| C    | -2.667513 | 1.090733  | 0.111882  |
| C    | -0.651237 | -3.340222 | -2.079013 |
| C    | -3.855632 | -0.733274 | -0.172284 |
| C    | -3.969335 | 0.645778  | -0.106117 |
| H    | -4.866110 | 1.238132  | -0.197187 |
| C    | 0.112761  | -2.176181 | 3.051114  |
| C    | 2.336702  | 2.891757  | -2.504765 |
| H    | 3.042940  | 2.070553  | -2.651804 |
| H    | 2.818605  | 3.836295  | -2.773295 |
| H    | 1.467391  | 2.730561  | -3.147404 |
| C    | -1.434653 | -3.567511 | 2.351901  |
| C    | 3.265877  | 3.186034  | 0.270719  |
| H    | 2.955308  | 3.246007  | 1.317268  |
| H    | 3.778050  | 4.110791  | -0.010590 |
| H    | 3.949961  | 2.341382  | 0.154275  |

### Geometry Optimisation for [WPt( $\mu$ -CPMe<sub>3</sub>)(CNMe)<sub>2</sub>(CO)<sub>2</sub>(Tp)]<sup>+</sup> [10]<sup>+</sup>

Method: DFT/ $\omega$ B97X-D/6-31G\*/LANL2D $\zeta$ , gas phase

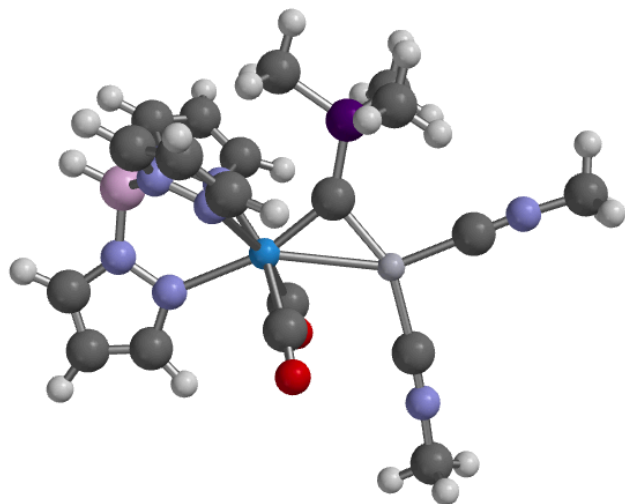

#### Cartesian Coordinates

| Atom | x         | y         | z         |
|------|-----------|-----------|-----------|
| Pt   | -2.426998 | 0.022790  | 0.547092  |
| W    | -0.048260 | -0.730789 | -0.697796 |
| P    | 0.241750  | 1.775644  | 1.656866  |
| C    | -0.527390 | 0.571754  | 0.654066  |
| N    | 1.773540  | -1.259546 | 0.477679  |
| C    | -1.043900 | -2.398667 | -0.187157 |
| O    | -1.567076 | -3.408526 | 0.022520  |
| N    | 1.323746  | 0.766319  | -1.629043 |
| N    | 1.110028  | -1.997650 | -2.162910 |
| O    | -2.209924 | -0.486057 | -2.993349 |
| C    | -1.455657 | -0.531630 | -2.118541 |
| N    | 3.024996  | -1.165172 | -0.017283 |
| N    | 2.447718  | -1.872365 | -2.330625 |
| C    | -3.432861 | 1.129135  | 1.802212  |
| N    | 2.644037  | 0.550180  | -1.801957 |
| C    | -3.961430 | -1.063431 | -0.144479 |
| N    | -4.033977 | 1.797021  | 2.549101  |
| N    | -4.804597 | -1.733015 | -0.586630 |
| C    | 2.871270  | -2.747083 | -3.255797 |
| C    | 1.069230  | 2.005230  | -2.060752 |

#### Cartesian Coordinates (cont.)

| Atom | x        | y         | z         |
|------|----------|-----------|-----------|
| C    | 0.702061 | -2.962396 | -2.995496 |
| C    | 1.782634 | -3.471307 | -3.713003 |
| H    | 1.775548 | -4.252376 | -4.456789 |
| C    | 1.883145 | -1.662427 | 1.747247  |
| C    | 2.245462 | 2.611245  | -2.507493 |
| H    | 2.367294 | 3.600016  | -2.921525 |
| C    | 3.220163 | 1.642465  | -2.331008 |
| C    | 3.917295 | -1.497284 | 0.930740  |
| C    | 2.033121 | 1.943962  | 1.422735  |
| H    | 2.528215 | 0.997472  | 1.652224  |
| H    | 2.414658 | 2.721260  | 2.091769  |
| H    | 2.249955 | 2.221231  | 0.388313  |
| C    | 3.228188 | -1.817117 | 2.089469  |

|   |           |           |           |
|---|-----------|-----------|-----------|
| H | 3.639943  | -2.138880 | 3.033304  |
| C | -0.471626 | 3.418600  | 1.356961  |
| H | -0.264707 | 3.713205  | 0.324974  |
| H | -0.039977 | 4.158262  | 2.037603  |
| H | -1.553931 | 3.370935  | 1.497636  |
| B | 3.242654  | -0.840513 | -1.509649 |
| H | 4.410497  | -0.868257 | -1.785546 |
| H | 4.276528  | 1.648191  | -2.555682 |
| H | 3.916442  | -2.793358 | -3.524233 |
| H | 4.974517  | -1.495667 | 0.710106  |
| H | 0.989898  | -1.822239 | 2.333989  |
| H | 0.057148  | 2.382451  | -2.028558 |
| H | -0.342436 | -3.236759 | -3.032658 |
| C | -5.791360 | -2.583000 | -1.150505 |
| H | -5.301784 | -3.443686 | -1.610799 |
| H | -6.352862 | -2.032323 | -1.907877 |
| H | -6.469249 | -2.923832 | -0.365486 |
| C | -4.854034 | 2.565760  | 3.417741  |
| H | -4.227384 | 3.183454  | 4.064686  |
| H | -5.460309 | 1.896106  | 4.031507  |
| H | -5.507952 | 3.208071  | 2.823827  |
| C | -0.012749 | 1.399122  | 3.415029  |
| H | 0.406334  | 2.188015  | 4.046324  |
| H | 0.477673  | 0.450710  | 3.648913  |
| H | -1.083258 | 1.296745  | 3.607996  |

## Geometry Optimisation for [WAu( $\mu$ -CPMe<sub>3</sub>)Cl(CO)<sub>2</sub>(Tp)]<sup>+</sup> [10]<sup>+</sup>

Method: DFT/ $\omega$ B97X-D/6-31G\*/LANL2D $\zeta$ , gas phase

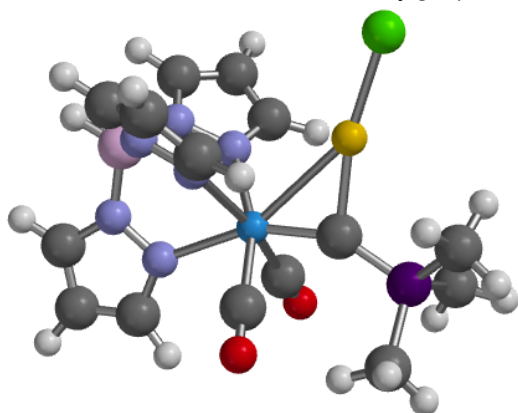

### Cartesian Coordinates

| Atom | x         | y         | z         |
|------|-----------|-----------|-----------|
| Au   | 0.645218  | -0.147535 | -2.540208 |
| W    | 0.088005  | 0.109975  | 0.258995  |
| Cl   | 0.424667  | -1.255130 | -4.547195 |
| P    | 2.098269  | 2.516102  | -1.385194 |
| N    | -1.926684 | -0.369852 | -0.460220 |
| N    | -0.653735 | -2.904623 | 0.513035  |
| N    | 0.336100  | -2.063068 | 0.134923  |
| N    | -0.794531 | -0.394233 | 2.221940  |
| N    | -2.600459 | -1.444587 | 0.005638  |
| O    | -0.882959 | 3.014572  | 1.059765  |
| N    | -1.625695 | -1.462898 | 2.310260  |
| C    | 1.099557  | 1.116927  | -0.971913 |
| O    | 2.758039  | 0.304871  | 1.957996  |
| C    | 1.786433  | 0.230676  | 1.352759  |
| C    | 1.356543  | -2.819298 | -0.293650 |
| C    | 1.022797  | -4.166707 | -0.199265 |
| H    | 1.624680  | -5.016682 | -0.478843 |
| C    | -0.536304 | 1.954740  | 0.784351  |
| C    | -1.478236 | -0.583473 | 4.344303  |
| H    | -1.610965 | -0.405470 | 5.399767  |
| C    | -2.713994 | 0.228438  | -1.364567 |
| C    | -0.260617 | -4.172748 | 0.322080  |
| C    | -3.794754 | -1.523503 | -0.599976 |
| C    | -3.910636 | -0.470657 | -1.492308 |
| H    | -4.739314 | -0.246828 | -2.145055 |
| C    | -0.703409 | 0.141413  | 3.448282  |
| C    | 3.851069  | 2.094025  | -1.244446 |
| H    | 4.151959  | 2.125953  | -0.193995 |
| H    | 4.451730  | 2.806424  | -1.817641 |
| H    | 4.016263  | 1.083323  | -1.628893 |
| C    | -2.044349 | -1.590526 | 3.576093  |
| C    | 1.751910  | 3.922388  | -0.299743 |
| H    | 1.002272  | 4.572493  | -0.757355 |
| H    | 2.670100  | 4.495396  | -0.139815 |
| H    | 1.381438  | 3.567289  | 0.665091  |
| B    | -1.969215 | -2.346584 | 1.079856  |
| H    | -2.713985 | -3.230116 | 1.397751  |
| H    | -2.371520 | 1.113217  | -1.881475 |
| H    | -4.479005 | -2.321289 | -0.352085 |
| H    | -0.086455 | 1.012615  | 3.617322  |

|   |           |           |           |
|---|-----------|-----------|-----------|
| H | -2.716903 | -2.391335 | 3.846353  |
| H | -0.920341 | -4.990663 | 0.570804  |
| H | 2.261220  | -2.355287 | -0.659309 |
| C | 1.743578  | 2.996235  | -3.093261 |
| H | 2.119301  | 4.005328  | -3.286292 |
| H | 0.663658  | 2.971297  | -3.262393 |
| H | 2.229257  | 2.289393  | -3.772264 |

## SUPPORTING INFORMATION

Calculated Infrared Spectrum for  $[W(\equiv CMe_3)(CO)_2(Tp)]$  (WC) (DFT/ $\omega$ B97X-D/6-31G\*/LANL2D $\zeta$ , gas phase)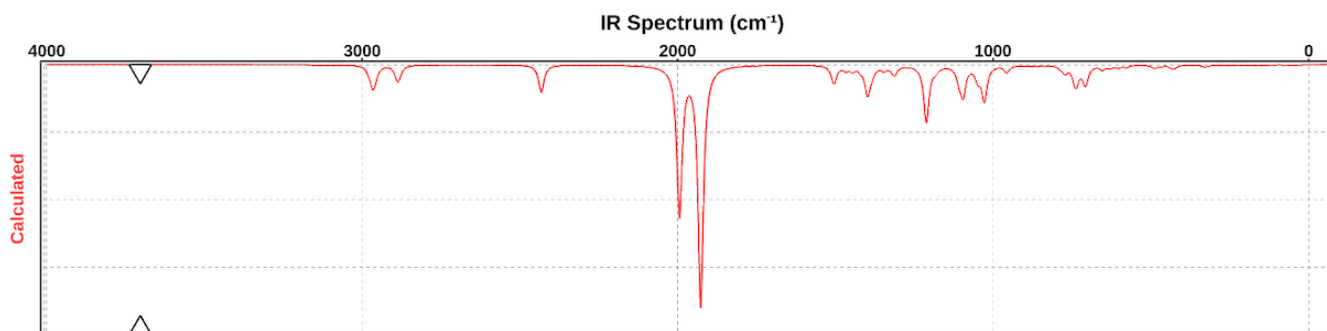Calculated Infrared Spectrum for  $[W(\equiv CSiMe_3)(CO)_2(Tp)]$  (WSi) (DFT/ $\omega$ B97X-D/6-31G\*/LANL2D $\zeta$ , gas phase)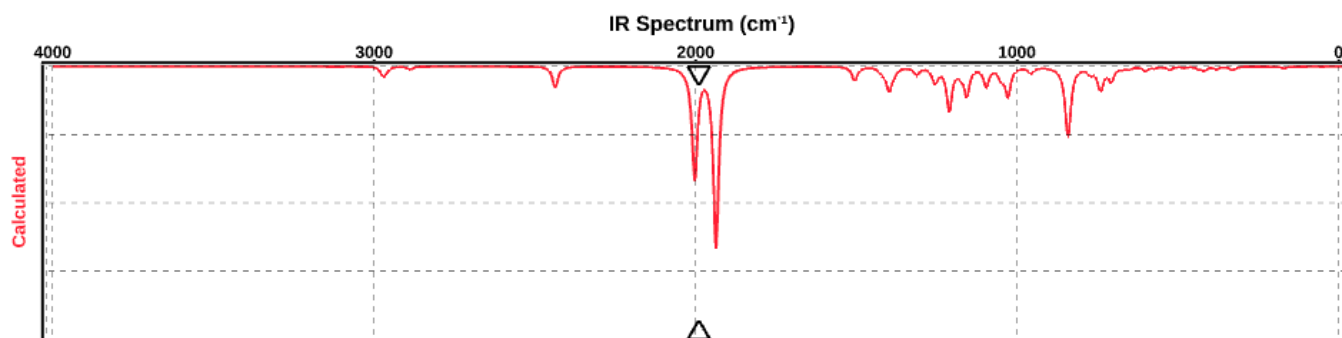Calculated Infrared Spectrum for  $[W(\equiv CNMe_3)(CO)_2(Tp)]^+$  (WN) (DFT/ $\omega$ B97X-D/6-31G\*/LANL2D $\zeta$ , gas phase)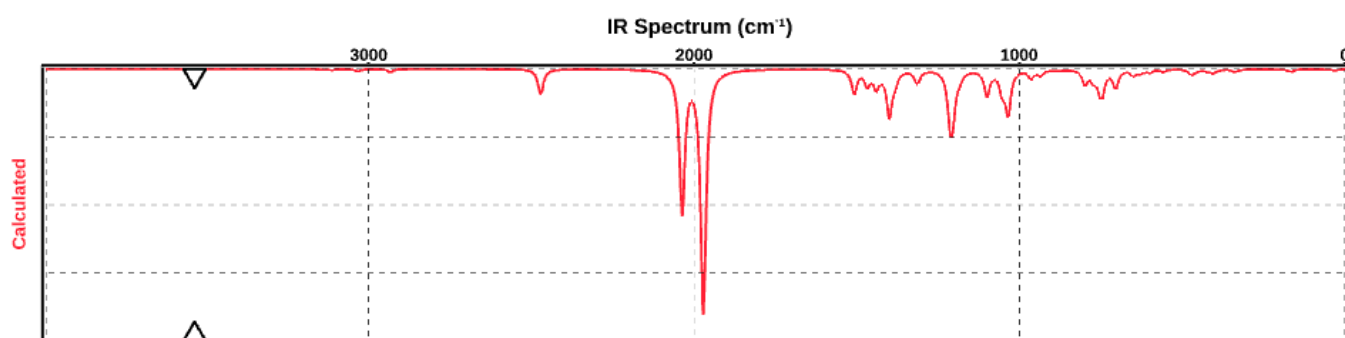



Calculated Infrared Spectrum for  $[\text{W}(\equiv\text{CPMe}_3)(\text{CO})_2(\text{Tp})]^+$  (WP) (DFT/ $\omega\text{B97X-D}/6\text{-31G}^*/\text{LANL2D}\zeta$ , gas phase)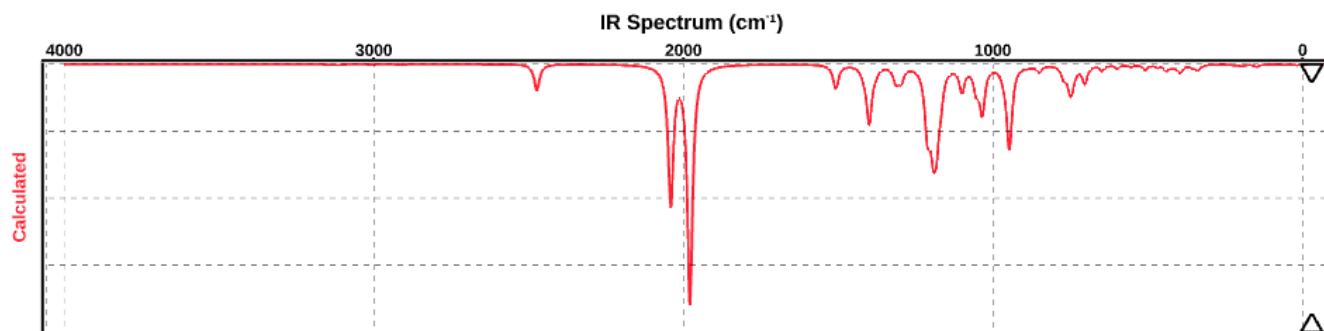Calculated Infrared Spectrum for  $[\text{WPt}(\mu\text{CPMe}_3)(\text{CNMe})_2(\text{CO})_2(\text{Tp})]^+$  [10]<sup>+</sup> (DFT/ $\omega\text{B97X-D}/6\text{-31G}^*/\text{LANL2D}\zeta$ , gas phase)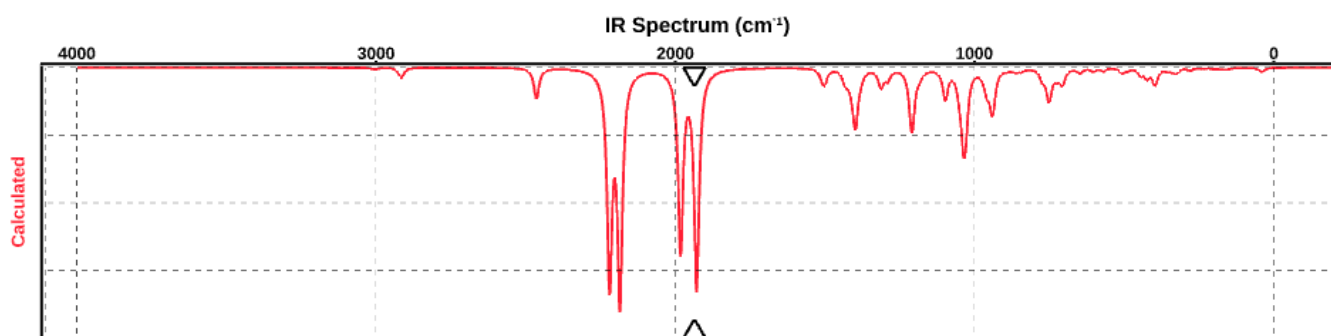Calculated Infrared Spectrum for  $[\text{WAu}(\mu\text{CPMe}_3)\text{Cl}(\text{CO})_2(\text{Tp})]^+$  [11]<sup>+</sup> (DFT/ $\omega\text{B97X-D}/6\text{-31G}^*/\text{LANL2D}\zeta$ , gas phase)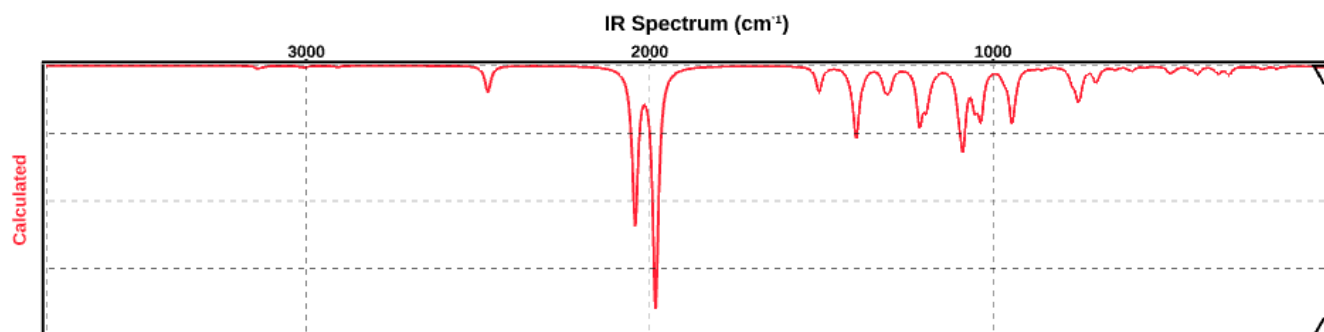

Supplement: d0dt02737e1.pdf [file d0dt02737e1.pdf]
